1  
2  
3  
4  
5  
6  
7  
8  
9  
10  
11  
12  
13  
14  
15  
16  
17  
18  
19  
20  
21  
22  
23  
24  
25  
26  
27  
28  
29

# Conformational plasticity and dynamic interactions of the N-terminal domain of the chemokine receptor CXCR1

Shalmali Kharche<sup>1,2</sup>, Manali Joshi<sup>3</sup>, Amitabha Chattopadhyay<sup>4\*</sup>, Durba Sengupta<sup>1,2\*</sup>

<sup>1</sup> CSIR-National Chemical Laboratory, Dr. Homi Bhabha Road, Pune 411 008, India

<sup>2</sup> Academy of Scientific and Innovative Research, Sector 19, Kamla Nehru Nagar, Ghaziabad 201 002, India

<sup>3</sup> S.P. Pune University, Ganeshkhind Road, Pune 411 008, India

<sup>4</sup> CSIR-Centre for Cellular and Molecular Biology, Uppal Road, Hyderabad 500 007, India

**Short Title:** Conformational dynamics of CXCR1 N-terminal domain

\*Corresponding author

E-mail: amit@ccmb.res.in (AC) or d.sengupta@ncl.res.in (DS)

## 30 **Abstract**

31           Dynamic interactions between G protein-coupled receptors (GPCRs) and their cognate  
32 protein partners at the membrane interface control several cellular signaling pathways. An  
33 important example is the association of CXC chemokine receptor 1 (CXCR1) with its cognate  
34 chemokine, interleukin-8 (IL8 or CXCL8) that regulates neutrophil-mediated immune  
35 responses. Although the N-terminal domain of the receptor is known to confer ligand  
36 selectivity, the conformational dynamics of this intrinsically disordered region of CXCR1 in  
37 particular, and chemokine receptors in general, remains unresolved. In this work, we have  
38 explored the interaction of CXCR1 with IL8 by microsecond time scale coarse-grain  
39 simulations that were validated by atomistic models and NMR chemical shift predictions. We  
40 show that the conformational plasticity of the *apo*-receptor N-terminal region is restricted upon  
41 ligand binding, driving it to an open C-shaped conformation. Importantly, we validated the  
42 dynamic complex sampled in our simulations against chemical shift perturbations reported by  
43 previous NMR studies. Our results indicate that caution should be exercised when chemical  
44 shift perturbation is used as a reporter of residue contacts in such dynamic associations. We  
45 believe our results represent a step forward in devising a strategy to understand intrinsically  
46 disordered regions in GPCRs and how they acquire functionally important conformational  
47 ensembles in dynamic protein-protein interfaces.

## 48 **Author summary**

49

50           How cells communicate with the outside environment is intricately controlled and  
51 regulated by a large family of receptors on the cell membrane (G protein-coupled receptors or  
52 GPCRs) that respond to external signals (termed ligands). Chemokine receptors belong to this  
53 GPCR family and regulate immune responses. We analyze here the first step of binding of a  
54 representative chemokine receptor (CXCR1) with its natural ligand, interleukin 8 (IL8) by an  
55 extensive set of molecular dynamics simulations. Our work complements previous mutational  
56 and NMR experiments which lack molecular-level resolution. We show that in the inactive  
57 state, one of the extracellular domains of the CXCR1 receptor, namely the N-terminal domain,  
58 is highly flexible and like a "shape-shifter" can exist in multiple conformational states.  
59 However, when IL8 binds, the N-terminal domain undergoes a conformational freezing, and  
60 acquires a C-shaped "claw-like" structure. The complex between the receptor and IL8 is still  
61 quite dynamic as this C-shaped N-terminal domain forms an extensive but slippery interface  
62 with the ligand. We further validated these results by quantitative comparison with NMR and  
63 mutagenesis studies. Our work helps clarify the inherent disorder in N-terminal domains of  
64 chemokine receptors and demonstrates how this domain can acquire functionally important  
65 conformational states in dynamic protein-protein interfaces.

## 66 **Introduction**

67 G protein-coupled receptors (GPCRs) are an important class of membrane-embedded  
68 receptors that respond to a diverse range of stimuli.<sup>1,2</sup> These receptors play a central role in  
69 several cellular signaling pathways, and consequently are targeted by a large number of  
70 drugs.<sup>3,4</sup> Recent advances in GPCR structural biology have helped to resolve the structure of  
71 transmembrane domains of several GPCRs. However, the interconnecting loops and the N-  
72 and C-terminal extramembranous regions remain largely unresolved.<sup>5,6</sup> The high flexibility  
73 associated with these domains confers an intrinsic challenge in resolving specific  
74 conformational states of GPCRs, but attaches a functional significance to it.<sup>6,7</sup> Both direct  
75 interaction (*e.g.*, between intracellular loop 3 (ICL3) and effectors<sup>8</sup>) and allosteric modulation  
76 by extramembranous loops (such as extracellular loops 2 and 3 (ECL2, ECL3))<sup>6,9,10</sup> have been  
77 reported in various GPCRs. The N-terminal region, known to interact with ligands<sup>11</sup> in GPCRs  
78 such as chemokine receptors,<sup>12-14</sup> is of special interest in this context. In addition, N-terminal  
79 population variants of several GPCRs have been reported to alter drug response by allosteric  
80 modulation of ligand binding.<sup>15-17</sup> Interestingly, lipid specificity and conformational  
81 sensitivity of extramembranous regions in GPCRs have recently been reported.<sup>18-20</sup> In spite of  
82 their functional role, extramembranous regions in GPCRs remain largely uncharacterized in  
83 terms of their structure and dynamics.

84 Chemokine receptors are members of the GPCR superfamily that bind chemokine  
85 secretory proteins and play a fundamental role in innate immunity and host defense.<sup>21,22</sup> These  
86 receptors highlight the functional importance of the N-terminal region since it represents the  
87 first site of ligand binding and confers selectivity to these receptors.<sup>23</sup> A common two-site/two-  
88 step model has been proposed for chemokine binding that suggests interactions between  
89 receptor N-terminal domain and chemokine core (site-I) and between the chemokine N-  
90 terminus and receptor extracellular regions or transmembrane residues (site-II).<sup>23-25</sup> In  
91 addition, recent reports confirm that the stoichiometry of binding is 1:1, although both the  
92 receptor and chemokines have been shown to dimerize in the cellular milieu.<sup>24-26</sup> Early  
93 attempts to structurally characterize these complexes focused on site-I interactions and solution

94 NMR approaches were successful in resolving the interactions between chemokines and short  
95 receptor fragments without the context of the full-length receptor or membrane  
96 environment.<sup>27,28</sup> More recently, crystal structures have resolved site-II interactions, but only  
97 a partial site-I engagement.<sup>29,30</sup> However, a superposition of structures with respect to the  
98 bound chemokine indicates that the placement of the receptor N-terminus could be receptor-  
99 specific.<sup>31</sup> Although the two-site model served as the initial framework of functionally relevant  
100 interactions leading to chemokine-receptor binding, growing literature suggests a need for  
101 more complex models accounting for the dynamic mechanism of receptor-ligand binding.<sup>32</sup>

102 The CXC chemokine receptor-1 (CXCR1) is a representative chemokine receptor that  
103 controls the migration of neutrophils to infected tissues.<sup>33</sup> The three-dimensional structure of  
104 CXCR1 (residues 29-324) has been elucidated by solid state NMR<sup>34</sup> and follows a typical  
105 GPCR fold, with seven transmembrane  $\alpha$ -helices interconnected by three intracellular and three  
106 extracellular loops. The two flanking domains, the extracellular N-terminal and intracellular  
107 C-terminal regions, were not resolved in this structure. CXCR1 binds the CXC ligand, CXCL8,  
108 commonly termed interleukin-8 (IL8). There are several reported structures of IL8 in  
109 monomeric and dimeric forms, although none bound to CXCR1.<sup>27,28,35</sup> Several studies have  
110 highlighted a crucial role of the N-terminal region of CXCR1 in ligand binding affinity and  
111 selectivity.<sup>36</sup> The interactions of IL8 were assessed using NMR with CXCR1 constructs of  
112 varying length, clearly indicating that IL8 could not bind to CXCR1 when the receptor N-  
113 terminal was truncated.<sup>37</sup> In addition, IL8 was shown to bind with higher affinity to the CXCR1  
114 N-terminal region in a lipid environment relative to that in solution,<sup>36</sup> in agreement with our  
115 previous work using fluorescence and molecular dynamics (MD) simulations which show  
116 membrane interaction of the CXCR1 N-terminal region.<sup>38-40</sup>

117 In this work, we have examined chemokine-receptor interaction focusing on the N-  
118 terminal region of CXCR1 and its role in chemokine binding. We performed simulations of  
119 *apo*-CXCR1 as well as CXCR1 coupled with IL8 at coarse-grain and atomistic resolutions to  
120 monitor differential dynamics of the N-terminal region. We show that the N-terminal region  
121 is the first site of chemokine binding which restricts its conformational dynamics. The  
122 receptor-chemokine (CXCR1-IL8) complex consists of an extensive dynamic interface and we

123 map the interactions both within the receptor and with the ligand. These results were further  
124 validated by comparison with chemical shift calculations reported in earlier NMR studies. Our  
125 results offer molecular insight into the interactions between CXCR1 and IL8, and would be  
126 useful in gaining a fundamental understanding of the initial events in chemokine-receptor  
127 interactions at site-I.

128

## 129 **Results**

130 The N-terminal region of the chemokine receptor CXCR1 remains structurally  
131 unresolved in experiments due to its inherent flexibility.<sup>34</sup> The importance of this region is  
132 reflected in reports that implicate it in the binding of the cognate chemokine (IL8),<sup>36,37</sup> similar  
133 to all members of the chemokine receptor family.<sup>14</sup> To explore the underlying molecular  
134 interactions, we have performed coarse-grain molecular dynamics simulations of CXCR1 and  
135 validated them against atomistic models. We report here the functional dynamics of the N-  
136 terminal region of CXCR1 in the *apo*- and IL8-bound forms.

137

### 138 **Conformational plasticity of the N-terminal region of *apo*-CXCR1**

139 Coarse-grain simulations of the *apo*-CXCR1 receptor were performed starting from the  
140 extended N-terminal conformer (Fig 1a). In total, twenty simulations were performed totaling  
141 to 200  $\mu$ s. During the simulations, the N-terminal region relaxed quickly from the initial  
142 structure and appeared more dynamic than the rest of the receptor. The N-terminal region  
143 sampled several orientations and was found to interact at different time points with the  
144 membrane bilayer and the transmembrane domains. The two main conformers observed  
145 (membrane-bound and receptor-contacted conformers) are shown in Figs 1b and 1c. These can  
146 be distinguished by the distance of distal residues 1-10 of the N-terminal region from the  
147 membrane (see Fig 1d). Several close interactions with the membrane (blue stretches) and  
148 multiple association-dissociation events were observed (see Fig 1d). When the N-terminal  
149 region dissociated from the membrane, it was located on top of the receptor, interacting with

150 the transmembrane helices. In this state, it adopted a more compact conformation, as reflected  
151 in the radius of gyration (see Fig 1e). Overall, the position of the N-terminal region in the *apo*-  
152 receptor was highly dynamic.

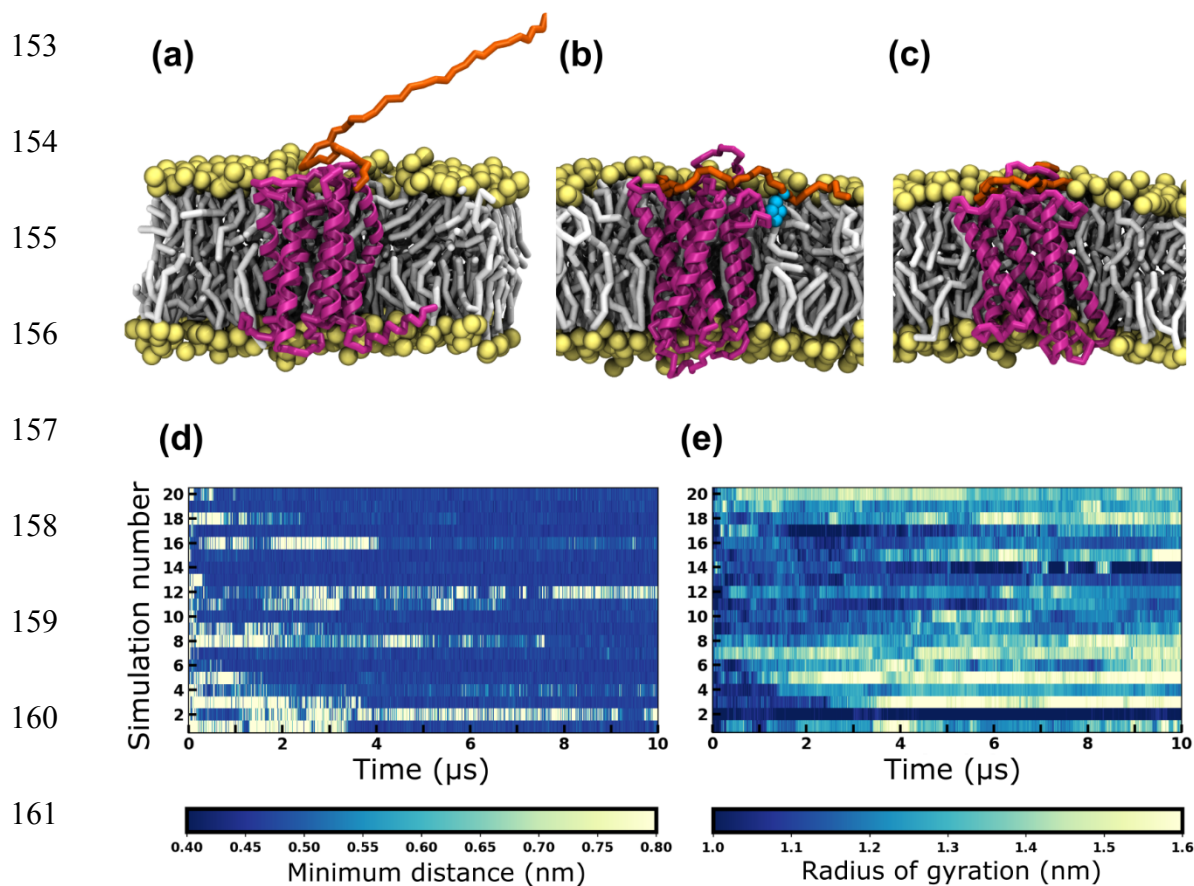

163 **Fig 1. Representative snapshots of CXCR1 embedded in a lipid bilayer and membrane**  
164 **interaction of its N-terminal region.** A visual representation of (a) the starting conformation  
165 with an extended N-terminal region, (b) the membrane-embedded N-terminal conformer and  
166 (c) the receptor-contacted N-terminal conformer. The receptor is depicted in magenta, the N-  
167 terminal region in orange, and the lipid headgroups and tails in yellow and gray, respectively.  
168 Water and ions are not displayed for clarity. The residue W10 of the N-terminal region, which  
169 interacts with the lipid bilayer is shown as cyan colored beads. (d) The minimum distance  
170 between the lipid bilayer and the distal part of the N-terminal region (residues 1-10) is plotted  
171 for 20 simulations of *apo*-CXCR1 as a function of time. The color bar denotes minimum  
172 distance in nm. A distance of  $\sim 0.4$  nm (dark blue patches) indicates the binding of the N-

173 terminal region to the lipid bilayer. (e) The radius of gyration of the N-terminal region is  
174 plotted for *apo*-CXCR1 as a function of time. The color bar denotes radius of gyration in nm.  
175 See Methods for more details.

176

177 To test the conformational landscape sampled in the coarse-grain simulations, we  
178 performed all-atom simulations of CXCR1 embedded in the membrane bilayer (see S1 Fig).  
179 The N-terminal region of CXCR1 adopted multiple conformations, and no stable secondary  
180 structure was observed over time (S1b Fig.). For a direct comparison, the intra-protein contacts  
181 were computed from both coarse-grain and atomistic simulations. Several off-diagonal  
182 elements were observed in both cases representing close interactions between residues which  
183 are sequentially apart (S1a Fig.). The off-diagonal contacts in the middle of the N-terminal  
184 region (around residues 20-25) indicate a compact conformation. Interestingly, we observed  
185 similar patterns in the contact maps (S1 Fig), indicating that the coarse-grain simulations were  
186 able to capture the overall conformational dynamics of this highly flexible region.

187

### 188 **The N-terminal region is the first site of ligand binding**

189 We carried out coarse-grain simulations of CXCR1 with IL8 to examine the effect of  
190 ligand binding upon the structural dynamics of the N-terminal region of CXCR1. Overall,  
191 forty simulations were performed with two conformations of CXCR1 N-terminal region  
192 (membrane-bound and receptor-contacted) and two placements of IL8 (N-domain of the ligand  
193 facing the receptor and away from it). During the course of the simulations, IL8 diffused  
194 randomly in water and was observed to bind to the membrane-embedded CXCR1 within  
195 microseconds. A representative snapshot of the CXCR1-IL8 complex is shown in Fig 2a. The  
196 binding events were quantified from the minimum distance between IL8 and the receptor (Fig  
197 2b and S2 Fig). The distance around 0.5 nm (blue stretches in the plot) indicate close  
198 interactions between the two proteins. A few binding-unbinding events were observed before



199 the final bound complex was formed and no further unbinding was observed during the course  
200 of the simulations.

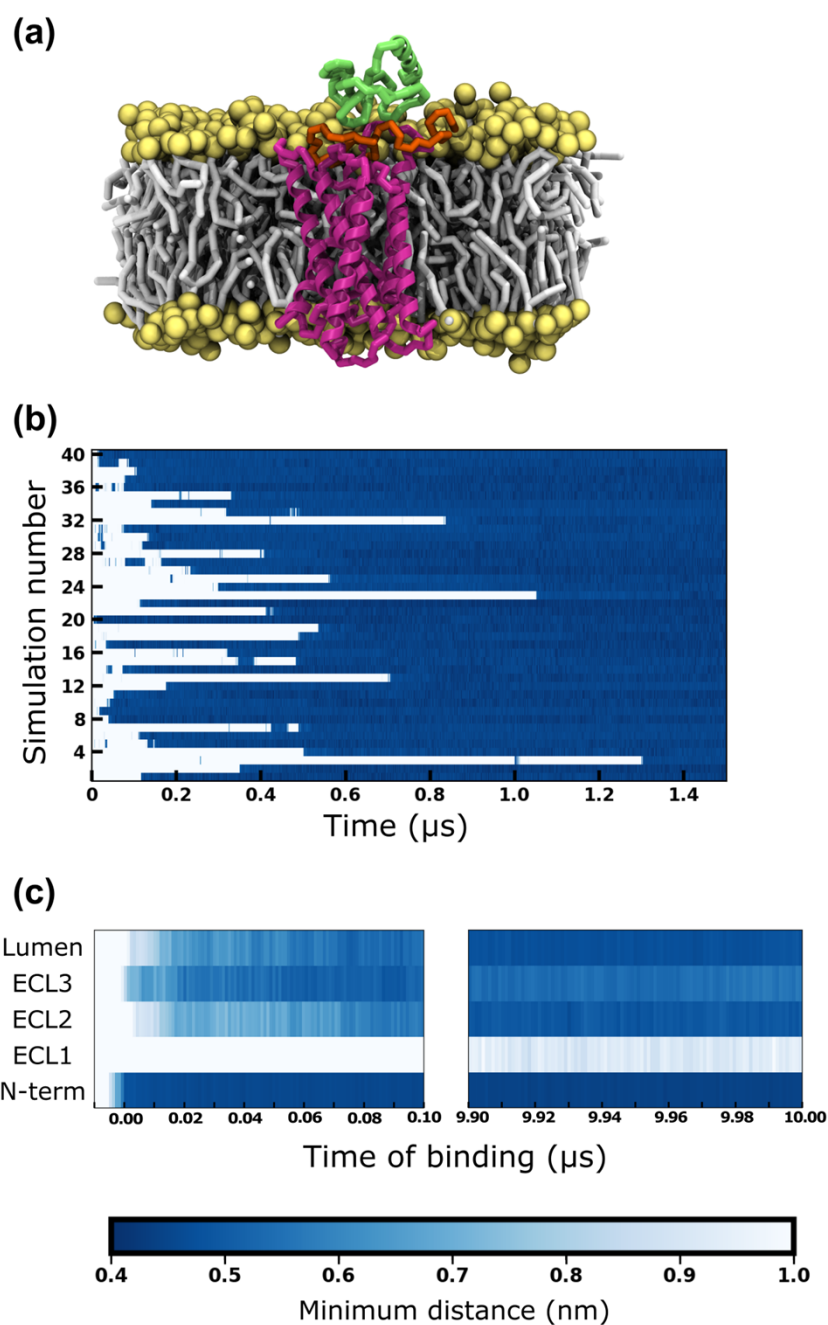

201 **Fig 2. Interactions between the extracellular domains of CXCR1 and IL8.** (a) A  
202 representative snapshot of IL8 bound to CXCR1. The receptor is shown in magenta, IL8 in  
203 green, and lipid headgroups and tails in yellow and gray, respectively. The N-terminal region  
204 of the receptor is highlighted in orange. Water molecules and ions are not shown for clarity.  
205 (b) The minimum distance (closest approach) between IL8 and CXCR1 plotted for the first 1.5

206  $\mu\text{s}$  in forty simulations. The white stretches represent the unbound regime and the blue  
207 stretches represent the ligand-bound regime. Time of binding ( $t = 0$ ) is defined as the time of  
208 first contact in the binding regime (0.5 nm distance cutoff) which remains undissociated till the  
209 end of the simulation. (c) The minimum distance between IL8 and various domains of the  
210 receptor as a function of time, considering the time of binding as  $t = 0$ . The values are averaged  
211 over all sets from the time of binding and plotted for the first 100 ns (left panel) and the last  
212 100 ns (right panel). The color bar denotes minimum distance between IL8 and CXCR1  
213 domains. See Methods for more details.

214

215 To understand the mechanism of binding, we characterized the interaction between the  
216 receptor domains and IL8 from the time of binding (Fig 2c). The time point corresponding to  
217 the binding event (time of binding  $t=0$ ) is considered to be the time frame where the final bound  
218 complex is formed (taken from Fig 2b). For clarity, the receptor domains considered were the  
219 N-terminal region, the three extracellular loops (ECL1-3) and the lumen defined as the residues  
220 from the transmembrane helices lining the top of the receptor lumen. The minimum distance  
221 (distance of closest contact) between these domains and IL8 was calculated from the time of  
222 binding and averaged over all simulations. Interestingly, the N-terminal region was observed  
223 to be the first site involved in binding of IL8 (Fig 2c). Subsequently, IL8 was observed to  
224 interact with ECL3 followed by ECL2 and the lumen, and ECL1 does not appear to make any  
225 contacts. These contacts are maintained till the end of the simulations (10  $\mu\text{s}$  after the initial  
226 binding) and the interactions with the N-terminal region appear quite stable. No interactions  
227 were observed with ECL1 consistent with the initial binding mode. We observed that the  
228 interactions with ECL3 reduced and that with ECL2 and the top of the lumen increased with  
229 time. We were unable to discern a deeper binding of the N-domain of IL8 in the receptor  
230 lumen. Overall, we observed that the N-terminal region of CXCR1 is the first site of binding  
231 for IL8 and this contact is maintained throughout the course of the simulations along with  
232 additional contact with sites on ECL2, ECL3 and the lumen.

233

## 234 Conformational restriction in the N-terminal region upon ligand binding

235 To analyze the effect of ligand binding on conformational dynamics of the N-terminal  
236 domain, we computed intra-protein contact maps of the N-terminal region in the ligand-bound  
237 complex. These contact maps represent pair-wise probabilities of interaction for each residue  
238 pair within the N-terminal region, averaged over simulation time and all simulation sets. A  
239 composite contact probability map displaying direct comparison of residue-wise contacts  
240 within the N-terminal region from *apo*-CXCR1 (upper diagonal) and CXCR1-IL8 complex  
241 (lower diagonal) is shown in Fig 3. Interestingly, several intra-protein contacts observed in the  
242 *apo*-receptor appear to be lost in the ligand-receptor complex and the N-terminal region  
243 appears to be more open in the ligand-receptor complex. A few intra-protein contacts were  
244 observed in the distal region of the N-terminal region in the ligand-bound complex, but appear  
245 to be relatively weak. We identified six representative inter-residue contacts that dynamically  
246 form in the *apo*-receptor, but are completely absent in the ligand-bound simulations (S3 Fig).  
247 These interactions include electrostatic interaction (Met1-Asp26), putative hydrogen bonding  
248 (Thr5-Thr18, Ser2-Thr18) and aromatic ring stacking (Phe17-Tyr27).

249

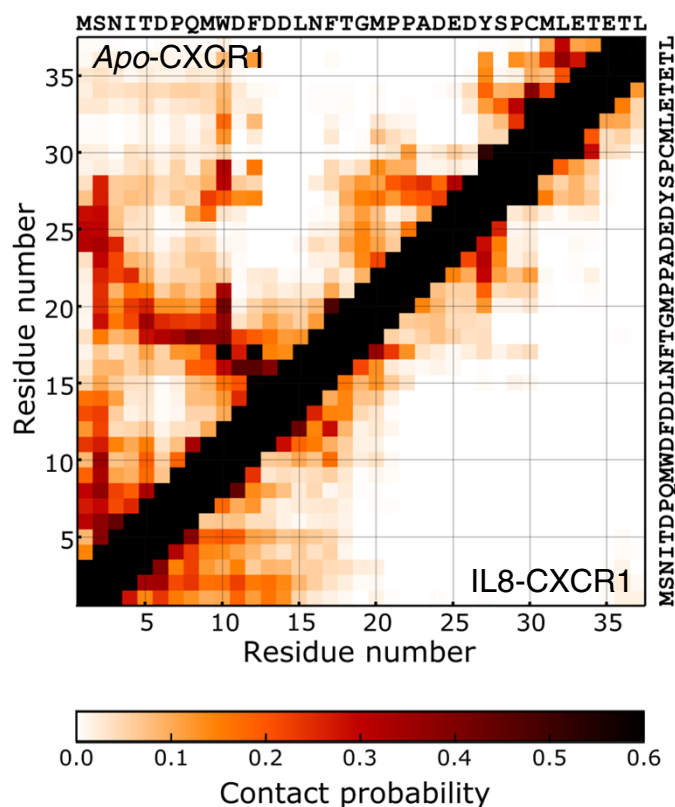

250

251 **Fig 3. Conformational dynamics of the N-terminal region of CXCR1.** Intra-protein contact  
252 maps of the N-terminal region of CXCR1 in presence (lower matrix) and absence (upper  
253 matrix) of the ligand. Residue-wise contact probabilities of the N-terminal region in *apo*- and  
254 IL8-bound CXCR1 are plotted in the top and bottom diagonal of the matrix, respectively. The  
255 amino acid sequence of the N-terminal region is displayed on the top and right. The values of  
256 contact probabilities (0.5 nm distance cutoff) are denoted in the color bar. See Methods for  
257 more details.

258

259 A more detailed characterization of the conformational dynamics was carried out by  
260 projecting the simulation trajectories onto a two-dimensional phase space. The two collective  
261 variables considered for the projection were the backbone RMSD of the N-terminal region and  
262 the distance distribution of an inter-residue contact Met1-Asp26 (Fig 4). The backbone RMSD  
263 describes an overall structural deviation with respect to a reference structure corresponding to  
264 the highest population cluster. The second reaction coordinate, *i.e.*, the distance between N-  
265 terminal residues Met1 and Asp26, reports on the end-to-end distance of the N-terminal region.  
266 Fig 4 shows the relative populations of the N-terminal region along these reaction coordinates  
267 sampled in the *apo*- and IL8-bound CXCR1 simulations. Multiple clusters were observed in  
268 the *apo*-receptor (marked I-III in Fig 4a), but only a single broad cluster (I) was observed in  
269 the ligand-bound receptor. The major cluster (cluster I in Fig 4b) in the IL8 bound simulations  
270 consists of conformers with a high end-to-end distance but low RMSD. The main cluster  
271 (cluster II in Fig 4a) in the *apo*-receptor exhibits a high RMSD. Interestingly, cluster I in the  
272 *apo*-receptor appears to overlap with a part of the conformational space sampled in the ligand-  
273 bound complex.

274

275

276

277

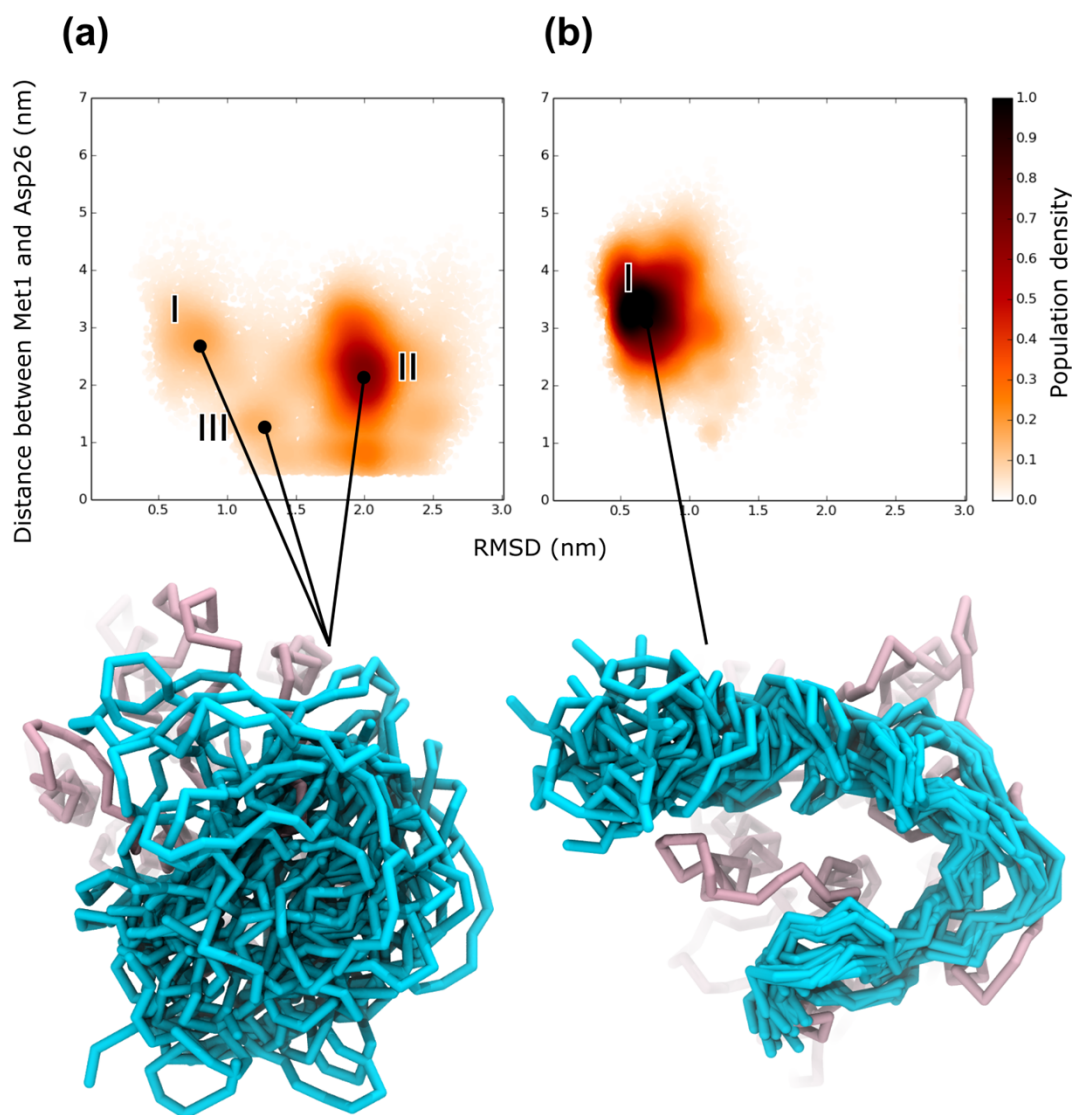

278

279 **Fig 4. Conformational landscape of the N-terminal region of CXCR1.** Population density  
280 map of the conformations sampled by the N-terminal region plotted as a function of backbone  
281 RMSD of the N-terminal region and the distance between side chains of two representative  
282 residues (Met1 and Asp26) for (a) *apo*-CXCR1 and (b) IL8-bound CXCR1. The most  
283 populated conformations are shown below the plots. The N-terminal region is shown in cyan  
284 and rest of the receptor is in pink. See Methods for more details.

285

286 The single cluster in the ligand-bound complex (Fig 4b) appears to be in contrast to the  
287 lack of intra-protein contacts observed in the receptor-ligand simulations (see Fig 3). A visual  
288 inspection revealed that the ligand-bound structures adopt a C-shape in the N-terminal region

289 (Fig 4b). Such a conformation allows a more extensive protein-protein interface when the  
290 ligand is bound to the receptor, but at the same time results in the loss of intra-protein contacts.  
291 To characterize this C-shaped state, we calculated the contact maps of the interactions between  
292 the N-terminal region and the extracellular loops (S4 Fig). Interestingly, we observed large  
293 differences in the interactions in the *apo*- and IL8-bound N-terminal region. The N-terminal  
294 region of the *apo*-receptor samples several interaction sites on the extracellular loops and we  
295 could not discern a consensus pattern of interacting residues, confirming the presence of  
296 diverse conformational states. In contrast, specific regions of the N-terminal region were found  
297 to interact with each of the extracellular loops in case of IL8-bound receptor, giving rise to a  
298 C-like shape.

299

### 300 **Mapping the N-terminal region interactions: Validation by chemical shift perturbations**

301 We analyzed the molecular interactions of the N-terminal region by calculating the  
302 contact probabilities with the chemokine (see Fig 5a). We observed an extensive contact  
303 surface between the ligand and the N-terminal region, and a large number of flexible contacts  
304 were observed along the length of the N-terminal region. The contact map is consistent with  
305 the C-shaped N-terminal region described above with maximal contact probabilities at the  
306 center of the region. In particular, a high contact probability is observed at residues 20-25.  
307 The residues predicted to have a high contact probability match well with previous mutagenesis  
308 data. In particular, residues Pro21 and Tyr27 have been previously shown by mutational  
309 studies to be critical for ligand binding.<sup>41</sup>

310 One of the few experimental approaches that are able to report conformational  
311 dynamics of this region is NMR using chemical shifts of the backbone amides that are closely  
312 related to their conformations. Chemical shift perturbations between the *apo*- and IL8-bound  
313 CXCR1 receptor from NMR studies in lipid environments have previously been reported.<sup>37,42</sup>  
314 To compare this data with simulations reported here, we chose representative structures from  
315 each of the coarse-grain simulation sets and mapped them to their atomistic representation.

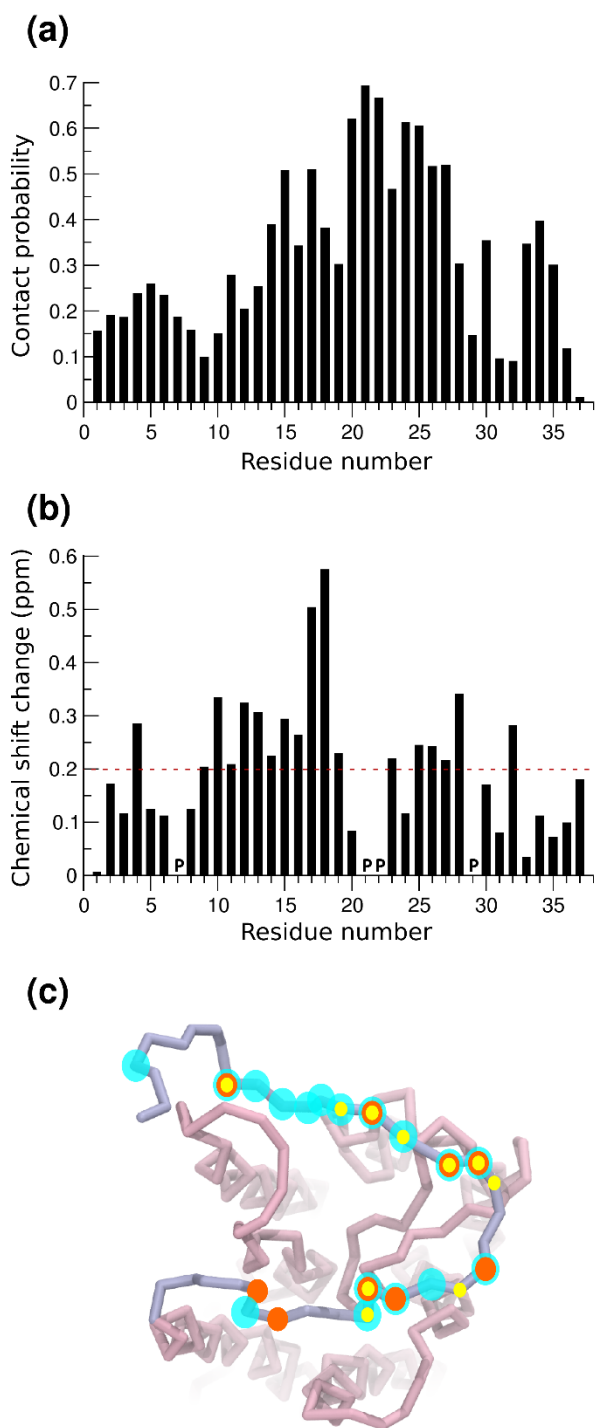

316 **Fig 5. Residue-wise interactions of the N-terminal region of CXCR1 with IL8.** (a) Residue-  
317 wise contact probabilities of the N-terminal region interacting with IL8. (b) Predicted chemical  
318 shift changes in the N-terminal region between the *apo*- and ligand-bound state. (c) The N-  
319 terminal residues with chemical shift perturbations above a cutoff (dotted lines in panel (b))  
320 mapped onto the receptor structure. The cyan transparent spheres represent residues from the

321 predictions. The orange and yellow spheres represent residues showing significant chemical  
322 shift changes as reported from NMR measurements.<sup>37,42</sup> See Methods and text for more details.

323

324 Subsequently, we computed the predicted chemical shifts in the backbone amides of N-  
325 terminal region using eq (1). The resultant chemical shift perturbations plotted as a function  
326 of residue number are shown in Fig 5b. We observe that the central segment of the N-terminal  
327 region (residues 10-19) shows a higher chemical shift perturbation. Residues at the distal and  
328 proximal end (residues 1-5 and 33-37) exhibit relatively lower perturbation. These  
329 perturbations arise both due to direct contacts with the ligand as well as conformational changes  
330 occurring in the N-terminal region upon ligand binding. Overall, we found a good agreement  
331 between the residues predicted in this work from simulations to have a large chemical shift  
332 perturbation and those reported earlier using NMR. These residues are pictorially depicted in  
333 Fig 5c. The residues highlighted in cyan were predicted by simulations to have a large chemical  
334 shift and residues in orange and yellow have been identified in previous experiments.<sup>37,42</sup> We  
335 observe a considerable overlap in these residues, although many more residues were predicted  
336 to have a large chemical shift perturbation from our simulations relative to those identified  
337 using NMR. Nonetheless, a remarkable consistency is observed in the chemical shift  
338 perturbations predicted from coarse-grain simulations and those determined from NMR  
339 studies.

340 Interestingly, the chemical shift perturbations do not exactly match the interactions  
341 identified between the CXCR1 N-terminal region and the ligand from our simulations. In  
342 particular, a comparison of Figs 5a and 5b shows that residues 20-25 have a high contact  
343 probability, but low chemical shift perturbations. Similarly, residues 17-20 exhibit higher  
344 chemical shift difference relative to the corresponding contact probability. It is apparent that  
345 these chemical shift perturbations include environment effects due to altered conformational  
346 dynamics of the N-terminal region, particularly due to the C-shaped conformer adopted in the  
347 ligand-bound form. Since chemical shift perturbations are often used as a direct reporter of  
348 protein-protein contacts, we propose that caution should be exercised while interpreting such



349 data, especially for intrinsically disordered regions. We believe that a combined approach  
350 integrating NMR and MD simulation approaches could provide novel insight into functional  
351 GPCR-ligand dynamics.

352

### 353 **Dynamic protein interactions define the chemokine N-domain and receptor interface**

354 The dynamic interactions reflected in the contact probabilities at the CXCR1 N-  
355 terminal region (see Fig 5a) were observed in the ligand as well. We clustered the conformers  
356 corresponding to the different binding modes of IL8 with the CXCR1 N-terminal region. The  
357 five clusters that were observed to be most populated are shown schematically in Fig 6a.  
358 Overall, it appears that the receptor N-terminal wraps around the ligand (IL8) and explores  
359 several binding modes. The main binding mode (~40% population) indicates that maximal  
360 interactions are localized with the N-domain and  $\alpha$ -helix of IL8. The second and third binding  
361 mode additionally involves  $\beta$ 1 and  $\beta$ 3 strands, respectively. Residues involved in maximal  
362 contact of IL8 with the N-terminal region of CXCR1 were identified and mapped onto the  
363 structure, along with residues reported from NMR<sup>37,42</sup> and mutagenesis experiments<sup>43-47</sup> (Fig  
364 6b). As expected, residues from the N-domain and  $\alpha$ -helix were found to be involved, together  
365 with residues from the  $\beta$ 1 and  $\beta$ 3 strands, in IL8-CXCR1 N-terminal domain interaction.  
366 Importantly, we found an overlap between the regions in IL8 predicted to interact with the  
367 receptor and those reported previously. However, the N-terminal residues predicted to be  
368 important from mutagenesis studies<sup>43-47</sup> were not observed in our simulations or NMR  
369 studies<sup>37,42</sup>. The conformational plasticity of CXCR1 N-terminal region and dynamic  
370 interfaces sampled in the protein-protein complex appear to be a hallmark of chemokine-  
371 receptor binding.

372

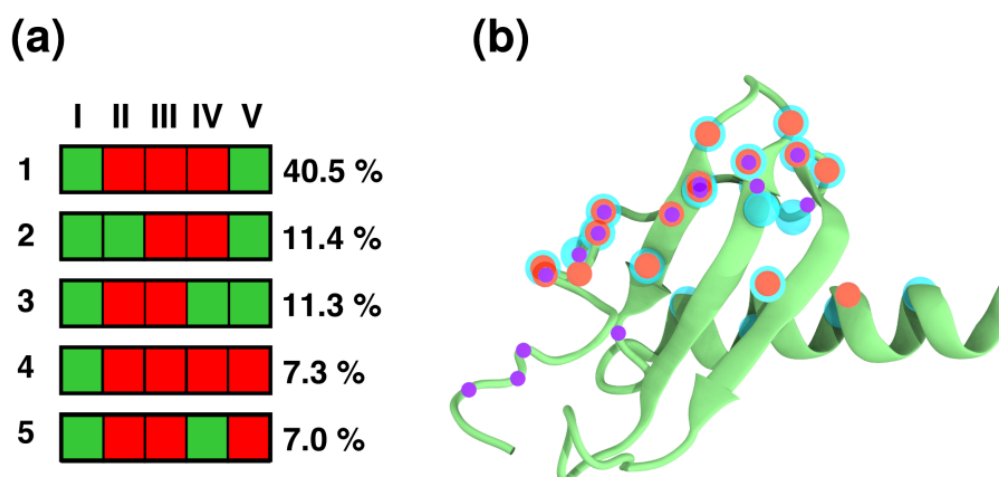

373 **Fig 6. Binding modes of IL8 characterizing its interactions with the N-terminal region of**  
374 **CXCR1.** (a) The most populated binding modes of IL8 characterized by the contacts formed  
375 by each of its structural element with the N-terminal region of CXCR1. The structural elements  
376 are denoted as I: N-domain, II:  $\beta$ 1-strand, III:  $\beta$ 2-strand, IV:  $\beta$ 3-strand, and V:  $\alpha$ -helix. The  
377 binding modes are numbered 1 to 5, in decreasing order of population. The green and red  
378 boxes represent interacting and non-interacting regions, respectively. (b) IL8 residues involved  
379 in binding to CXCR1 mapped on the cartoon representation of IL8. The cyan spheres represent  
380 interacting residues identified from our simulations. The orange and violet spheres represent  
381 interacting residues determined from previous NMR<sup>37,42</sup> and mutagenesis<sup>43-47</sup> studies,  
382 respectively. See Methods and text for more details.

383

384

## 385 Discussion

386 The chemokine family of receptors are an important class of GPCRs that bind to the  
387 chemokine signaling proteins *via* their extracellular domains with a partial involvement of the  
388 transmembrane helices.<sup>23</sup> A molecular resolution of CXCR1-IL8 interactions would open up  
389 avenues for therapeutic design and an overall understanding of immune signaling. In this work,

390 we have addressed the molecular details underlying chemokine-receptor interactions focusing  
391 on the representative pair, CXCR1-IL8. In particular, we have analyzed the structural  
392 dynamics of the N-terminal region of CXCR1 in both *apo*- and ligand-bound forms. In the  
393 *apo*-receptor, the N-terminal region is highly dynamic, consistent with the absence of  
394 resolution by NMR<sup>34</sup> and in agreement with its intrinsically disordered nature.<sup>38,39</sup> Upon ligand  
395 binding, the N-terminus adopts a dynamic C-shaped conformation that facilitates ligand  
396 binding *via* an extensive and dynamic surface. Our results are in overall agreement with  
397 chemical shift differences reported from NMR studies. Taken together, our results represent  
398 an important step toward understanding chemokine-receptor interactions, especially with  
399 respect to the first site of binding.

400 An important finding from our work is the inherent conformational dynamics of the N-  
401 terminal region and the binding interface. The identification and prediction of molecular  
402 details underlying such protein-protein interfaces is challenging in the context of GPCR-ligand  
403 interactions. In mechanistic terms, the main challenges are (i) resolving distinct  
404 temporal/spatial interactions (two-site/two-step model), (ii) accounting for the dynamics of the  
405 intrinsically disordered N-terminal region, and (iii) inherent technical difficulties in resolving  
406 the structural dynamics of membrane receptors. We observed differential conformational  
407 dynamics sampled by the N-terminal region in the presence and absence of the ligand.  
408 Interestingly, the *apo*-receptor samples a sub-space overlapping with the IL8-bound N-terminal  
409 region dynamics (Fig. 4), suggesting a conformational selection by the ligand in the *apo*-  
410 receptor. Counterintuitively, the larger dynamics in the *apo*-receptor is associated with  
411 increased intra-protein contacts, whereas the C-shaped ligand-bound complex exhibits reduced  
412 intra-protein contacts. These loss of contacts within the N-terminal region in the IL8-bound  
413 complex are replaced by ligand contacts in the dynamic ligand-receptor interface. The dynamic  
414 protein-protein interface observed here represents an important aspect in the emerging  
415 understanding of plasticity in GPCR complexes.<sup>48</sup>

416 We observe that the N-terminal region is the first site of ligand binding in the CXCR1  
417 receptor, consistent with models based on previous fluorescence and NMR studies.<sup>36,37</sup> In the  
418 simulations, the chemokine adopts a peripheral arrangement and a deeper binding of N-domain

419 in the receptor lumen was not observed. This mode of binding differs from crystal structures  
420 of other chemokine receptors, but is consistent with CXCR1 NMR data.<sup>37</sup> In addition, a recent  
421 cryo-EM structure of a ternary complex of CXCR2, IL8 and G-protein reports that IL8  
422 displayed a shallow binding mode compared to the other co-crystal structures of chemokines  
423 and their receptors.<sup>49</sup> The extensive contact surface between the ligand and the receptor N-  
424 terminal region are consistent with recent hypothesis from experimental approaches in related  
425 receptors.<sup>50</sup> In this work, we have compared chemical shift perturbations predicted from our  
426 simulations with results from NMR studies. Although the overall trends match quite well, we  
427 believe that the differences in the quantitative values could arise from the differential ensemble  
428 averages of experiments and simulations (due to different time scales associated with these  
429 approaches), peptide constructs used in experiments, and inaccuracies in prediction tools. In  
430 this context, we would like to recommend that caution should be exercised in assigning  
431 residues with high chemical shift perturbations to binding sites in receptors.<sup>51</sup> Our results  
432 clearly show that the residues with maximum interactions do not necessarily exhibit the highest  
433 chemical shift perturbation. Instead, altered conformational dynamics of receptor N-terminal  
434 region (as reported here) could influence the observed chemical shift perturbations.

435 Computational studies, in close link with experimental approaches, have attempted to  
436 overcome some of the resolution problems associated with structure-based experiments.  
437 Several studies have combined docking followed by short MD simulations<sup>52,53</sup> and have been  
438 able to capture important interactions, such as electrostatic interactions at site-I. Computational  
439 design of chemokine binding proteins, such as receptor-derived peptides capture agents from  
440 the extracellular domains of CXCR1<sup>53</sup> has also been reported. Similar approaches combining  
441 docking with free energy calculations were used to design IL8-based peptide inhibitors to  
442 inhibit binding of CXCR1.<sup>54</sup> To circumvent the problem of limited sampling, coarse-grain  
443 simulations coupled with replica exchange have been successfully used for predicting  
444 conformational ensembles associated with the binding of cyclic peptide antagonist to  
445 CXCR4.<sup>55</sup> Coarse-grain simulations, in particular, appear to be well suited to predict protein-  
446 protein interactions within the membrane, such as in single transmembrane helical  
447 receptors<sup>56,57</sup> and GPCRs.<sup>58-61</sup>

448 In conclusion, we have used a combined atomistic and coarse-grain simulation  
449 approach to analyze the mechanism of binding of the chemokine IL8 to its cognate receptor  
450 CXCR1. We were able to observe the dynamic interfaces formed during the binding of CXCR1  
451 and IL8. In addition, our results show that a conformational restriction of the flexible N-  
452 terminal region of the receptor induced by the ligand governs chemokine binding. These  
453 results suggest a conformational selection by the chemokine during the binding. The  
454 complementarity in shape and dynamic protein-protein interface appears to drive chemokine  
455 recognition by the receptor. We believe that our results represent an important step toward  
456 robust analysis of complex GPCR-ligand interactions and in designing improved therapeutics.

457

458

## 459 **Methods**

### 460 **System setup and simulation parameters**

461 The sequence of human CXCR1 N-terminal region (residues 1-37) was taken from the  
462 UniProtKB database (ID: P25024) and the structure was modeled in an extended conformation  
463 using Discovery Studio 3.5 (Accelrys Software Inc., Release 3.5, San Diego, CA). The *apo*-  
464 CXCR1 structure considered in this study was built by coupling the modeled structure of N-  
465 terminal domain to the NMR structure of CXCR1 (PDB ID 2LNL: residues 38-324). The  
466 energy of final atomistic structure was minimized (50,000 steps) using the steepest descent  
467 method. The structure was then mapped to its coarse-grain representation using parameters  
468 from the Martini v2.1 force field.<sup>62,63</sup> The receptor was embedded in a pre-equilibrated 1-  
469 palmitoyl-2-oleoyl-*sn*-glycero-3-phosphocholine (POPC) bilayer (284 lipids) using *insane.py*  
470 script<sup>64</sup> and then solvated. Twenty replicate simulations of 10  $\mu$ s each were carried out for  
471 *apo*-CXCR1. The conformations of the N-terminal region sampled during these simulations  
472 were clustered, and two distinct receptor conformations were chosen, one with the N-terminal  
473 coiled on the top of the receptor (receptor-contacted) and other with the N-terminal interacting  
474 with the membrane bilayer (membrane-bound). For the ligand binding simulations of the two  
475 conformers (receptor-contacted and membrane-bound), IL8 was inserted at a distance of  $\sim$ 3  
476 nm from the receptor to avoid potential bias arising from pre-placement. We considered two

477 different orientations of IL8 while building these setups, resulting in four unique starting  
478 configurations of the CXCR1-IL8 simulations. The coarse-grain representation of IL8 was  
479 obtained by mapping from the atomistic three-dimensional structure (PDB ID: 1ILQ). Forty  
480 simulations of 10  $\mu$ s each were run from these starting structures, both with and without elastic  
481 potential functions to fix the structural domains in IL8.<sup>65</sup> The remaining parameters and setup  
482 were same as that of the CXCR1-IL8 system. The total simulation time was 400  $\mu$ s,  
483 corresponding to 1.6 ms of atomistic sampling time.

484 All simulations were performed using the GROMACS-4.5.5 package.<sup>66,67</sup> For coarse-  
485 grain simulations, Martini force field (versions 2.0 and 2.2)<sup>62,63</sup> was used to represent lipids  
486 and proteins, respectively. Standard parameters corresponding to the coarse-grain Martini  
487 simulations were used. Non-bonded interactions were modeled using a cutoff of 1.2 nm.  
488 Electrostatic interactions were shifted to zero in the range 0 to 1.2, whereas Lennard-Jones  
489 potential was shifted to zero in the range of 0.9 to 1.2. Temperature was coupled to a thermostat  
490 at 300 K with a coupling constant of 0.1 ps using the v-rescale thermostat.<sup>68</sup> Pressure was  
491 coupled at 1 bar with a coupling constant of 0.5 ps using the semi-isotropic Berendsen  
492 algorithm<sup>69</sup> independently in the plane of the bilayer and perpendicular to the bilayer.  
493 Production runs were performed with a time step of 20 fs. Initial velocities for the systems  
494 were randomly chosen from a Maxwell distribution at 300 K.

495 The atomistic model of *apo*-CXCR1 was used as a starting structure for the all-atom  
496 MD simulations. The receptor was inserted in a pre-equilibrated POPC bilayer using the  
497 CHARMM-GUI module.<sup>70</sup> Water and chloride ions were added to solvate and neutralize the  
498 charge on the system. Energy minimization was performed to remove steric clashes. The  
499 system was equilibrated under NVT conditions for 100 ps, followed by NPT ensemble for 1  
500 ns, with position restraints on the receptor backbone. A production run of 1  $\mu$ s was carried out  
501 as a control. In the atomistic simulations, temperature coupling was applied with the v-rescale  
502 thermostat<sup>68</sup> to maintain temperature at 300 K. Semi-isotropic pressure coupling was applied  
503 to maintain a pressure of 1 bar along the direction of bilayer plane and perpendicular, using  
504 Parrinello-Rahman barostat.<sup>71</sup> The long-range electrostatic interactions were treated with the  
505 particle mesh Ewald (PME) algorithm. The short-range electrostatic interactions and Lennard-

506 Jones interactions were cutoff at 1.2 nm. A time step of 2 fs was considered for atomistic  
507 simulations.

508

## 509 **Analysis**

510 Simulations were analyzed using in-house scripts, VMD<sup>72</sup> and GROMACS utilities.  
511 The residue-wise contacts were calculated using the `g_distMat` tool  
512 ([https://github.com/rjdkmr/g\\_distMat](https://github.com/rjdkmr/g_distMat)). For a given pair of residues, a contact was defined if  
513 the minimum distance between the residues (distance of closest approach) was within the cutoff  
514 (0.6 nm). The contact probability was calculated for each residue pair as the time for which  
515 they were in contact, normalized over the simulation length and averaged across all the  
516 simulation replicates.

517 To calculate chemical shift changes in the CXCR1 N-terminal region upon IL8 binding,  
518 we considered the main structures sampled in the coarse-grain simulations by clustering the  
519 conformations from each simulation replicate and a single conformer from each set was chosen.  
520 These conformers were transformed to the atomistic description (CHARMM36 force field)  
521 using Martini analysis tools.<sup>64</sup> These structures were provided as an input to the SHIFTX2  
522 program<sup>73</sup> which predicts chemical shifts of backbone amides. The chemical shift values were  
523 averaged over replicates and chemical shift changes were calculated using the equation:

524

$$525 \quad \Delta\delta = \sqrt{\frac{(\Delta\delta_H)^2 + \left(\frac{\Delta\delta_N}{5}\right)^2}{2}} \quad (1)$$

526

527 where  $\Delta\delta_H$  is the change in the backbone amide proton chemical shift and  $\Delta\delta_N$  is the change in  
528 the backbone amide nitrogen chemical shift.

## 529 **Acknowledgments**

530 We gratefully acknowledge computing resources from CSIR-NCL and CSIR-Fourth  
531 Paradigm Institute. S.K. thanks the Council of Scientific and Industrial Research, Govt. of  
532 India, for the award of a Senior Research Fellowship. A.C. thanks Sreetama Pal for help and  
533 discussion during the preparation of the manuscript. We thank members of the Chattopadhyay  
534 laboratory for critically reading the manuscript and for their comments.

535

## 536 **Author Contributions**

537 **Conceptualization:** Durba Sengupta, Manali Joshi, Amitabha Chattopadhyay.

538 **Formal analysis:** Durba Sengupta, Shalmali Kharche.

539 **Funding acquisition:** Durba Sengupta, Amitabha Chattopadhyay.

540 **Investigation:** Shalmali Kharche.

541 **Methodology:** Durba Sengupta, Shalmali Kharche.

542 **Resources:** Durba Sengupta, Amitabha Chattopadhyay.

543 **Supervision:** Durba Sengupta, Manali Joshi.

544 **Writing - original draft:** Shalmali Kharche, Durba Sengupta.

545 **Writing - review & editing:** Durba Sengupta, Amitabha Chattopadhyay.



## 546 **References**

547

- 548 1. Rosenbaum DM, Rasmussen SGF, Kobilka BK. The structure and function of G-protein-  
549 coupled receptors. *Nature*. 2009;459: 356-363.
- 550 2. Pierce KL, Premont RT, Lefkowitz RJ. Seven-transmembrane receptors. *Nat Rev Mol*  
551 *Cell Biol*. 2002;3: 639-650.
- 552 3. Jacobson KA. New paradigms in GPCR drug discovery. *Biochem Pharmacol*. 2015;  
553 98: 541-555.
- 554 4. Hauser AS, Attwood MM, Rask-Andersen M, Schiöth HB, Gloriam DE. Trends in GPCR  
555 drug discovery: new agents, targets and indications. *Nat Rev Drug Discov*. 2017;16: 829-  
556 842.
- 557 5. Venkatakrisnan AJ, Flock T, Prado, DE, Oates ME, Gough J, Babu MM. Structured  
558 and disordered facets of the GPCR fold. *Curr Opin Struct Biol*. 2014;27: 129-137.
- 559 6. Pal S, Chattopadhyay A. Extramembranous regions in G protein-coupled receptors:  
560 cinderella in receptor biology? *J Membr Biol*. 2019;252: 483-497.
- 561 7. Chattopadhyay A. GPCRs: lipid-dependent membrane receptors that act as drug targets.  
562 *Adv Biol*. 2014;2014: 143023.
- 563 8. Szczepek M, Beyrière F, Hofmann KP, Elgeti M, Kazmin R, Rose A, et al. Crystal  
564 structure of a common GPCR-binding interface for G protein and arrestin. *Nat Commun*.  
565 2014;5: 4801.
- 566 9. Unal H, Karnik SS. Domain coupling in GPCRs: the engine for induced conformational  
567 changes. *Trends Pharmacol Sci*. 2012;33: 79-88.
- 568 10. Peeters MC, van Westen GJP, Li Q, IJzerman AP. Importance of the extracellular loops  
569 in G protein-coupled receptors for ligand recognition and receptor activation. *Trends*  
570 *Pharmacol Sci*. 2011;32: 35-42.
- 571 11. Coleman JLJ, Ngo T, Smith NJ. The G protein-coupled receptor N-terminus and receptor  
572 signalling: N-tering a new era. *Cell Signal*. 2017;33: 1-9.

- 573 12. Prado GN, Suetomi K, Shumate D, Maxwell C, Ravindran A, Rajarathnam K, et al.  
574 Chemokine signaling specificity: essential role for the N-terminal domain of chemokine  
575 receptors. *Biochemistry*. 2007;46: 8961-8968.
- 576 13. Ravindran A, Joseph PRB, Rajarathnam K. Structural basis for differential binding of  
577 the interleukin-8 monomer and dimer to the CXCR1 N-domain: role of coupled  
578 interactions and dynamics. *Biochemistry*. 2009;48: 8795-8805.
- 579 14. Szpakowska M, Fievez V, Arumugan K, van Nuland N, Schmit J-C, Chevigné A.  
580 Function, diversity and therapeutic potential of the N-terminal domain of human  
581 chemokine receptors. *Biochem Pharmacol*. 2012;84: 1366-1380.
- 582 15. Hauser AS, Chavali S, Masuho I, Jahn LJ, Martemyanov KA, Gloriam DE, et al.  
583 Pharmacogenomics of GPCR drug targets. *Cell* 2018;172: 41-54.e19.
- 584 16. Shahane G, Parsania C, Sengupta D, Joshi M. Molecular insights into the dynamics of  
585 pharmacogenetically important N-terminal variants of the human  $\beta_2$ -adrenergic receptor.  
586 *PLoS Comput Biol*. 2014;10: e1004006.
- 587 17. Bhosale S, Nikte SV, Sengupta D, Joshi M. Differential dynamics underlying the  
588 Gln27Glu population variant of the  $\beta_2$ -adrenergic receptor. *J Membr Biol*. 2019;252:  
589 499-507.
- 590 18. Prasanna X, Jafurulla M, Sengupta D, Chattopadhyay A. The ganglioside GM1 interacts  
591 with the serotonin<sub>1A</sub> receptor via the sphingolipid binding domain. *Biochim Biophys*  
592 *Acta Biomembr*. 2016;1858: 2818-2826.
- 593 19. Pal S, Aute R, Sarkar P, Bose S, Deshmukh MV, Chattopadhyay A. Constrained  
594 dynamics of the sole tryptophan in the third intracellular loop of the serotonin<sub>1A</sub> receptor.  
595 *Biophys Chem*. 2018;240: 34-41.
- 596 20. Dijkman PM, Muñoz-García JC, Lavington SR, Kumagai PS, dos Reis RI, Yin D, et al.  
597 Conformational dynamics of a G protein-coupled receptor helix 8 in lipid membranes.  
598 *Sci Adv*. 2020: 6: eaav8207.
- 599 21. Proudfoot AEI. Chemokine receptors: multifaceted therapeutic targets. *Nat Rev*  
600 *Immunol*. 2002;2: 106-115.

- 601 22. Rosenkilde MM, Schwartz TW. The chemokine system - a major regulator of  
602 angiogenesis in health and disease. *APMIS* 2004;112: 481-495.
- 603 23. Rajagopalan L, Rajarathnam K. Structural basis of chemokine receptor function - a  
604 model for binding affinity and ligand selectivity. *Biosci Rep.* 2006;26: 325-339.
- 605 24. Monteclaro FS, Charo IF. The amino-terminal extracellular domain of the MCP-1  
606 receptor, but not the RANTES/MIP-1 $\alpha$  receptor, confers chemokine selectivity. evidence  
607 for a two-step mechanism for MCP-1 receptor activation. *J Biol Chem.* 1996;271: 19084-  
608 19092.
- 609 25. Kufareva I, Salanga CL, Handel TM. Chemokine and chemokine receptor structure and  
610 interactions: implications for therapeutic strategies. *Immunol Cell Biol.* 2015;93: 372-  
611 383.
- 612 26. Rajarathnam K, Sykes BD, Kay CM, Dewald B, Geiser T, Baggiolini M, et al. Neutrophil  
613 activation by monomeric interleukin-8. *Science.* 1994;264: 90-92.
- 614 27. Skelton NJ, Quan C, Reilly D, Lowman H. Structure of a CXC chemokine-receptor  
615 fragment in complex with interleukin-8. *Structure* 1999;7: 157-168.
- 616 28. Berkamp S, Park SH, De Angelis AA, Marassi FM, Opella SJ. Structure of monomeric  
617 interleukin-8 and its interactions with the N-terminal binding site-I of CXCR1 by  
618 solution NMR spectroscopy. *J Biomol NMR.* 2017;69: 111-121.
- 619 29. Kufareva I, Gustavsson M, Zheng Y, Stephens BS, Handel TM. What do structures tell  
620 us about chemokine receptor function and antagonism? *Annu Rev Biophys.* 2017;46:  
621 175-198.
- 622 30. Arimont M, Sun S-L, Leurs R, Smit M, de Esch IJP, de Graaf C. Structural analysis of  
623 chemokine receptor-ligand interactions. *J Med Chem.* 2017;60: 4735- 4779.
- 624 31. Arimont M, Hoffmann C, de Graaf C, Leurs R. Chemokine receptor crystal structures:  
625 what can be learned from them? *Mol Pharmacol.* 2019;96: 765-777.
- 626 32. Kleist AB, Getschman AE, Ziarek JJ, Nevins AM, Gauthier P-A, Chevigné A, et al. New  
627 paradigms in chemokine receptor signal transduction: moving beyond the two-site  
628 model. *Biochem Pharmacol.* 2016;114: 53-68.

- 629 33. Baggiolini M, Dewald B, Moser B. Interleukin-8 and related chemotactic cytokines-CXC  
630 and CC chemokines. *Adv Immunol.* 1994;55: 97-179.
- 631 34. Park SH, Das, BB, Casagrande F, Tian Y, Nothnagel HJ, Chu M, et al. Structure of the  
632 chemokine receptor CXCR1 in phospholipid bilayers. *Nature.* 2012;491: 779-783.
- 633 35. Rajarathnam K, Clark-Lewis I, Sykes BD. <sup>1</sup>H NMR solution structure of an active  
634 monomeric interleukin-8. *Biochemistry.* 1995;34: 12983-12990.
- 635 36. Rajagopalan L, Rajarathnam K. Ligand selectivity and affinity of chemokine receptor  
636 CXCR1. Role of N-terminal domain. *J Biol Chem.* 2004;279: 30000-30008.
- 637 37. Park SH, Casagrande F, Cho L, Albrecht L, Opella SJ. Interactions of interleukin-8 with  
638 the human chemokine receptor CXCR1 in phospholipid bilayers by NMR spectroscopy.  
639 *J Mol Biol.* 2011;414: 194-203.
- 640 38. Haldar S, Raghuraman H, Namani T, Rajarathnam K, Chattopadhyay A. Membrane  
641 interaction of the N-terminal domain of chemokine receptor CXCR1. *Biochim Biophys*  
642 *Acta Biomembr.* 2010;1798: 1056-1061.
- 643 39. Chaudhuri A, Basu P, Haldar S, Kombrabail M, Krishnamoorthy G, Rajarathnam K, et  
644 al. Organization and dynamics of the N-terminal domain of chemokine receptor CXCR1  
645 in reverse micelles: effect of graded hydration. *J Phys Chem B* 2013;117: 1225-1233.
- 646 40. Kharche S, Joshi M, Sengupta D, Chattopadhyay A. Membrane-induced organization  
647 and dynamics of the N-terminal domain of chemokine receptor CXCR1: insights from  
648 atomistic simulations. *Chem Phys Lipids.* 2018;210: 142-148.
- 649 41. Attwood MR, Borkakoti N, Bottomley GA, Conway EA, Cowan I, Fallowfield AG, et  
650 al. Identification and characterisation of an inhibitor of interleukin-8: a receptor based  
651 approach. *Bioorg Med Chem Lett.* 1996;6: 1869-1874.
- 652 42. Joseph PRB, Spyropoulos L, Rajarathnam K. Dynamics-derived insights into complex  
653 formation between the CXCL8 monomer and CXCR1 N-terminal domain: an NMR  
654 study. *Molecules.* 2018;23: 2825.
- 655 43. Hébert CA, Vitangcol RV, Baker JB. Scanning mutagenesis of interleukin-8 identifies a  
656 cluster of residues required for receptor binding. *J Biol Chem.* 1991;266: 18989-18994.

- 657 44. Hammond MEW, Shyamala V, Siani MA, Gallegos CA, Feucht PH, Abbott J, et al.  
658 Receptor recognition and specificity of interleukin-8 is determined by residues that  
659 cluster near a surface-accessible hydrophobic pocket. *J Biol Chem.* 1996;271: 8228-  
660 8235.
- 661 45. Schraufstatter IU, Ma M, Oades ZG, Barritt DS, Cochrane CG. The role of Tyr<sup>13</sup> and  
662 Lys<sup>15</sup> of interleukin-8 in the high affinity interaction with the interleukin-8 receptor type  
663 A. *J Biol Chem.* 1995;270: 10428-10431.
- 664 46. Williams G, Borkakoti N, Bottomley GA, Cowan I, Fallowfield AG, Jones PS, et al.  
665 Mutagenesis studies of interleukin-8. identification of a second epitope involved in  
666 receptor binding. *J Biol Chem.* 1996;271: 9579-9586.
- 667 47. Suetomi K, Lu Z, Heck T, Wood TG, Prusak DJ, Dunn KJ, et al. Differential mechanisms  
668 of recognition and activation of interleukin-8 receptor subtypes. *J Biol Chem.* 1999;274:  
669 11768-11772.
- 670 48. Kharche SA, Sengupta D. Dynamic protein interfaces and conformational landscapes of  
671 membrane protein complexes. *Curr Opin Struct Biol.* 2020;61: 191-197.
- 672 49. Liu K, Wu L, Yuan S, Wu M, Xu Y, Sun Q, et al. Structural basis of CXC chemokine  
673 receptor 2 activation and signalling. *Nature* 2020;585: 135-140.
- 674 50. Gustavsson M, Dyer DP, Zhao C, Handel TM. Kinetics of CXCL12 binding to atypical  
675 chemokine receptor 3 reveal a role for the receptor N terminus in chemokine binding. *Sci*  
676 *Signal.* 2019;12: eaaw3657.
- 677 51. Ziarek JJ, Volkman BF. NMR in the analysis of functional chemokine interactions and  
678 drug discovery. *Drug Discov Today Technol.* 2012;9: e293-e299.
- 679 52. Liou J-W, Chang F-T, Chung Y, Chen W-Y, Fischer WB, Hsu H-J. *In silico* analysis  
680 reveals sequential interactions and protein conformational changes during the binding of  
681 chemokine CXCL-8 to its receptor CXCR1. *PLoS One.* 2014;9: e94178.
- 682 53. Helmer D, Rink I, Dalton JAR, Brahm K, Jöst M, Nargang TM et al. Rational design of  
683 a peptide capture agent for CXCL8 based on a model of the CXCL8: CXCR1 complex.  
684 *RSC Adv.* 2015;5: 25657-25668.

- 685 54. Jiang S-J, Liou J-W, Chang C-C, Chung Y, Lin L-F, Hsu H-J. Peptides derived from  
686 CXCL8 based on *in silico* analysis inhibit CXCL8 interactions with its receptor CXCR1.  
687 Sci Rep. 2016;5: 18638.
- 688 55. Delort B, Renault P, Charlier L, Raussin F, Martinez J, Floquet N. Coarse-grained  
689 prediction of peptide binding to G-protein coupled receptors. J Chem Inf Model.  
690 2017;57: 562-571.
- 691 56. Lelimosin M, Limongelli V, Sansom MSP. Conformational changes in the epidermal  
692 growth factor receptor: role of the transmembrane domain investigated by coarse-grained  
693 metadynamics free energy calculations. J Am Chem Soc. 2016;138: 10611-10622.
- 694 57. Pawar AB, Sengupta D. Resolving the conformational dynamics of ErbB growth factor  
695 receptor dimers. J Struct Biol. 2019;207: 225-233.
- 696 58. Prasanna X, Chattopadhyay A, Sengupta D. Cholesterol modulates the dimer interface  
697 of the  $\beta_2$ -adrenergic receptor via cholesterol occupancy sites. Biophys J. 2014;106:  
698 1290-1300.
- 699 59. Prasanna X, Sengupta D, Chattopadhyay A. Cholesterol-dependent conformational  
700 plasticity in GPCR dimers. Sci Rep. 2016;6: 31858.
- 701 60. Sengupta D, Prasanna X, Mohole M, Chattopadhyay A. Exploring GPCR-lipid  
702 interactions by molecular dynamics simulations: excitements, challenges, and the way  
703 forward. J Phys Chem B. 2018;122: 5727-5737.
- 704 61. Prasanna X, Mohole M, Chattopadhyay A, Sengupta D. Role of cholesterol-mediated  
705 effects in GPCR heterodimers. Chem Phys Lipids. 2020;227: 104852.
- 706 62. Marrink SJ, Risselada HJ, Yefimov S, Tieleman DP, de Vries AH. The MARTINI force  
707 field: coarse grained model for biomolecular simulations. J Phys Chem B. 2007;111:  
708 7812-7824.
- 709 63. de Jong DH, Singh G, Bennett WFD, Arnarez C, Wassenaar TA, Schäfer LV, et al.  
710 Improved parameters for the Martini coarse-grained protein force field. J Chem Theory  
711 Comput. 2013;9: 687-697.

- 712 64. Wassenaar TA, Ingólfsson HI, Böckmann RA, Tieleman DP, Marrink SJ. Computational  
713 lipidomics with *insane*: a versatile tool for generating custom membranes for molecular  
714 simulations. *J Chem Theory Comput.* 2015;11: 2144-2155.
- 715 65. Periole X, Cavalli M, Marrink S-J, Ceruso MA. Combining an elastic network with a  
716 coarse-grained molecular force field: structure, dynamics, and intermolecular  
717 recognition. *J Chem Theory Comput.* 2009;5: 2531-2543.
- 718 66. Van Der Spoel D, Lindahl E, Hess B, Groenhof G, Mark AE, Berendsen HJC.  
719 GROMACS: fast, flexible, and free. *J Comput Chem.* 2005;26: 1701-1718.
- 720 67. Pronk S, Páll S, Schulz R, Larsson P, Bjelkmar P, Apostolov R, et al. GROMACS 4.5: a  
721 high-throughput and highly parallel open source molecular simulation toolkit.  
722 *Bioinformatics.* 2013;29: 845-854.
- 723 68. Bussi G, Donadio D, Parrinello M. Canonical sampling through velocity rescaling. *J*  
724 *Chem Phys.* 2007;126: 014101.
- 725 69. Berendsen HJC, Postma JPM, van Gunsteren WF, DiNola A, Haak JR. Molecular  
726 dynamics with coupling to an external bath. *J Chem Phys.* 1984;81: 3684.
- 727 70. Wu EL, Cheng X, Jo S, Rui H, Song KC, Dávila-Contreras EM, et al. CHARMM-GUI  
728 *membrane builder* toward realistic biological membrane simulations. *J Comput Chem.*  
729 2014;35: 1997-2004.
- 730 71. Parrinello M, Rahman A. Polymorphic transitions in single crystals: a new molecular  
731 dynamics method. *J Appl Phys.* 1981;52: 7182.
- 732 72. Humphrey W, Dalke A, Schulten K. VMD: visual molecular dynamics. *J Mol Graph.*  
733 1996;14: 33-38.
- 734 73. Han B, Liu Y, Ginzinger SW, Wishart DS. SHIFTX2: significantly improved protein  
735 chemical shift prediction. *J Biomol NMR.* 2011;50: 43-57.

**Figure 1**  
**Kharche *et al.***

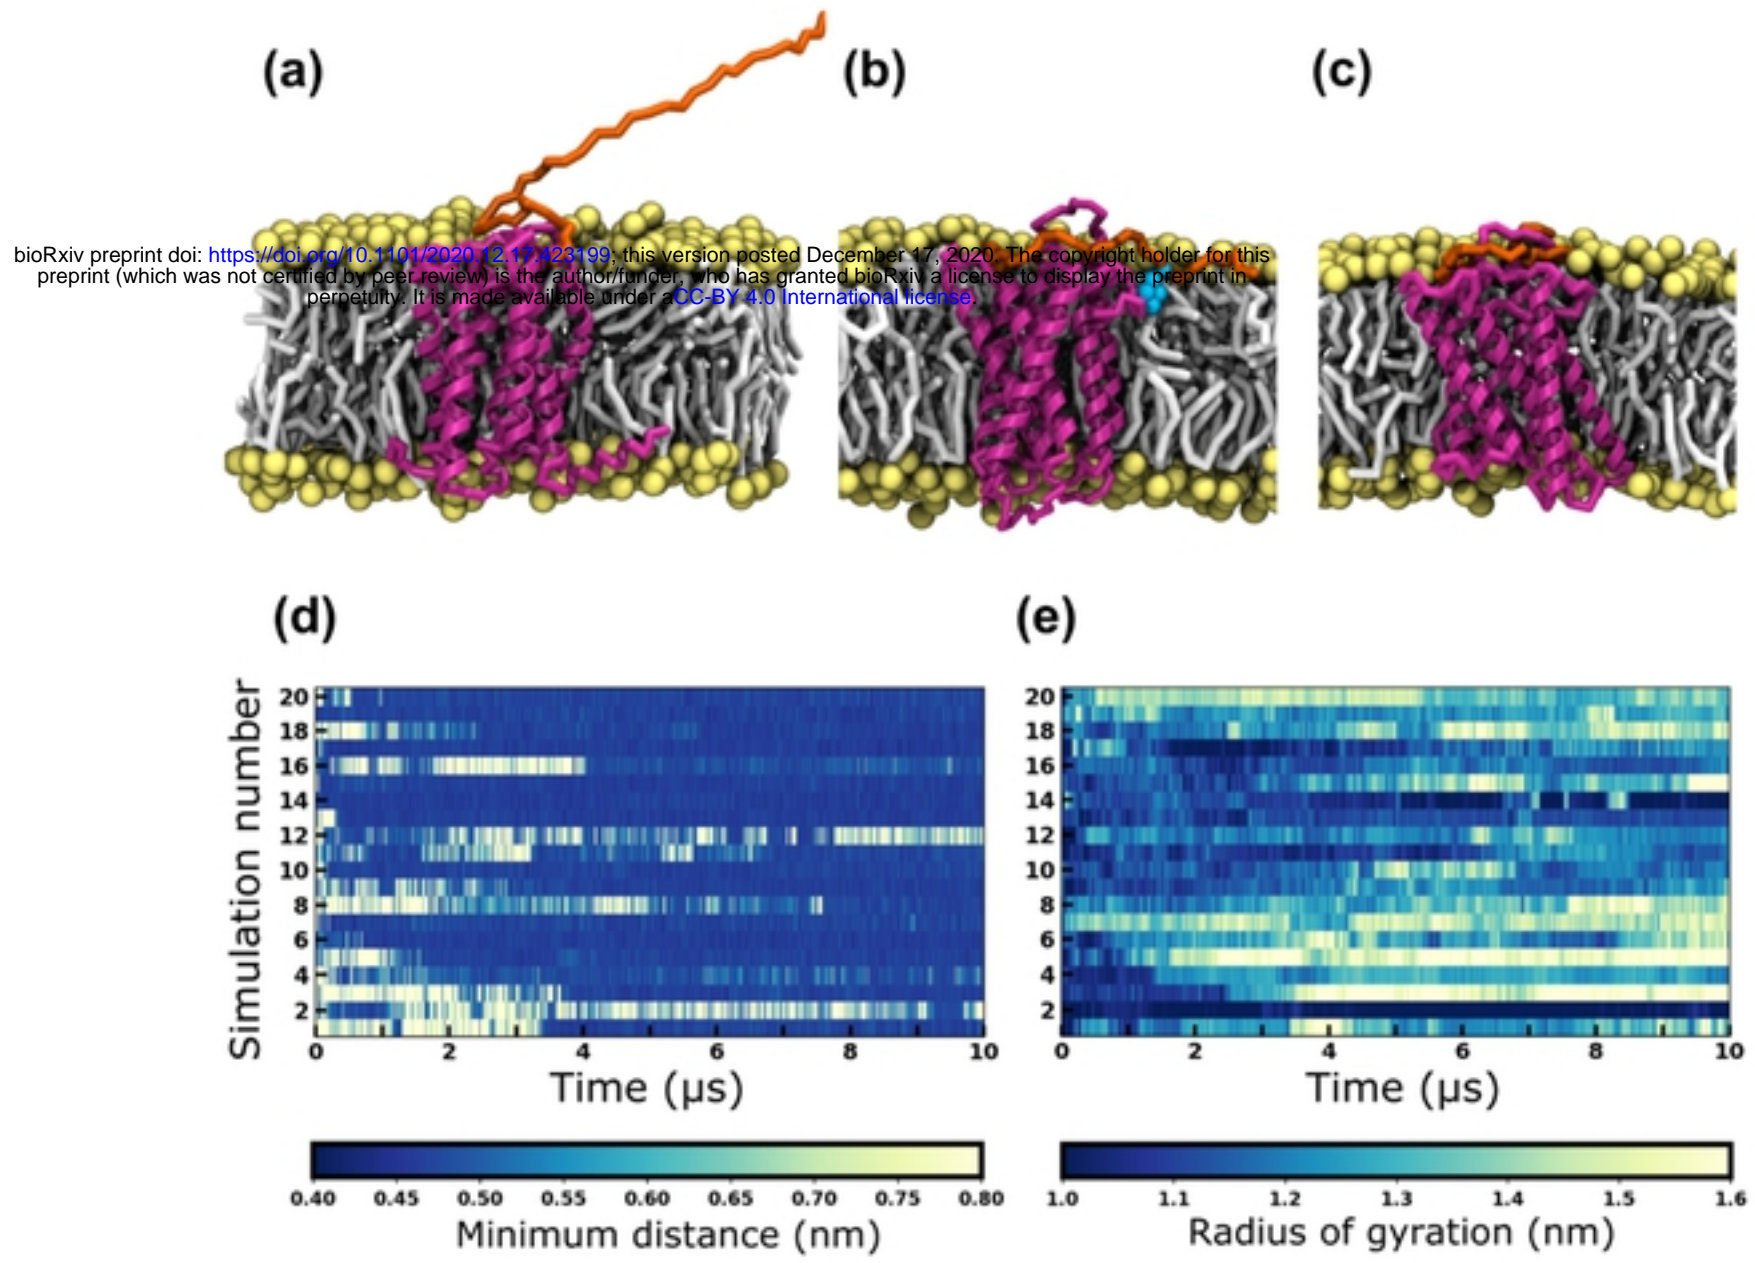



**Figure 2**  
**Kharche *et al.***

**(a)**

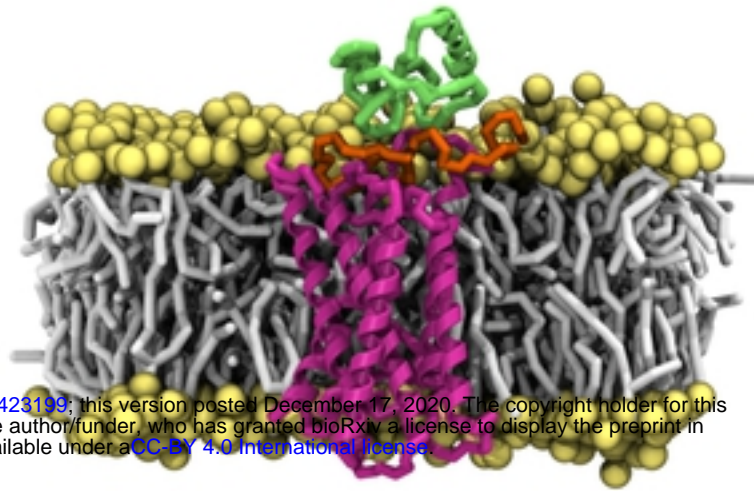

bioRxiv preprint doi: <https://doi.org/10.1101/2020.12.17.423199>; this version posted December 17, 2020. The copyright holder for this preprint (which was not certified by peer review) is the author/funder, who has granted bioRxiv a license to display the preprint in perpetuity. It is made available under aCC-BY 4.0 International license.

**(b)**

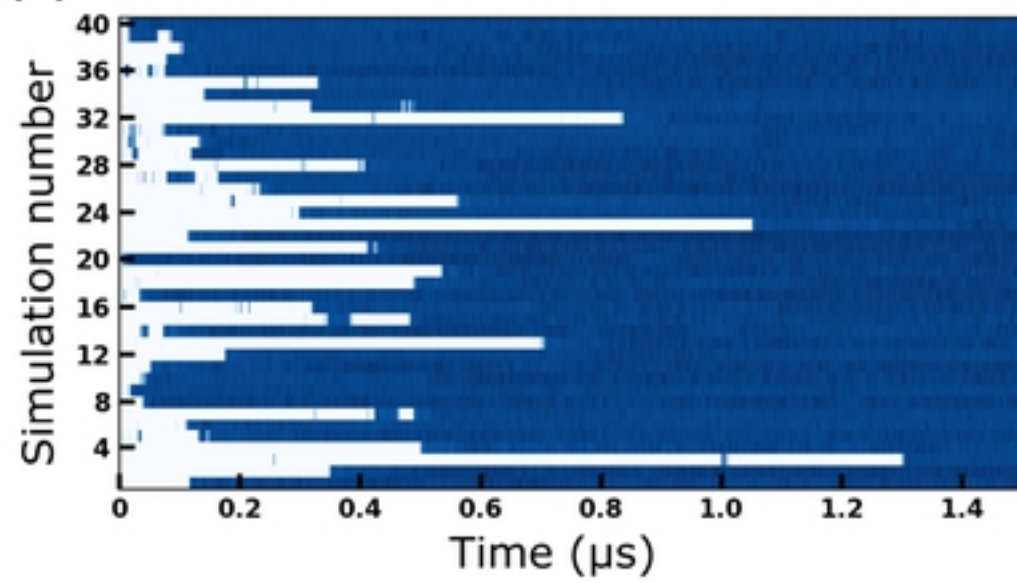

**(c)**

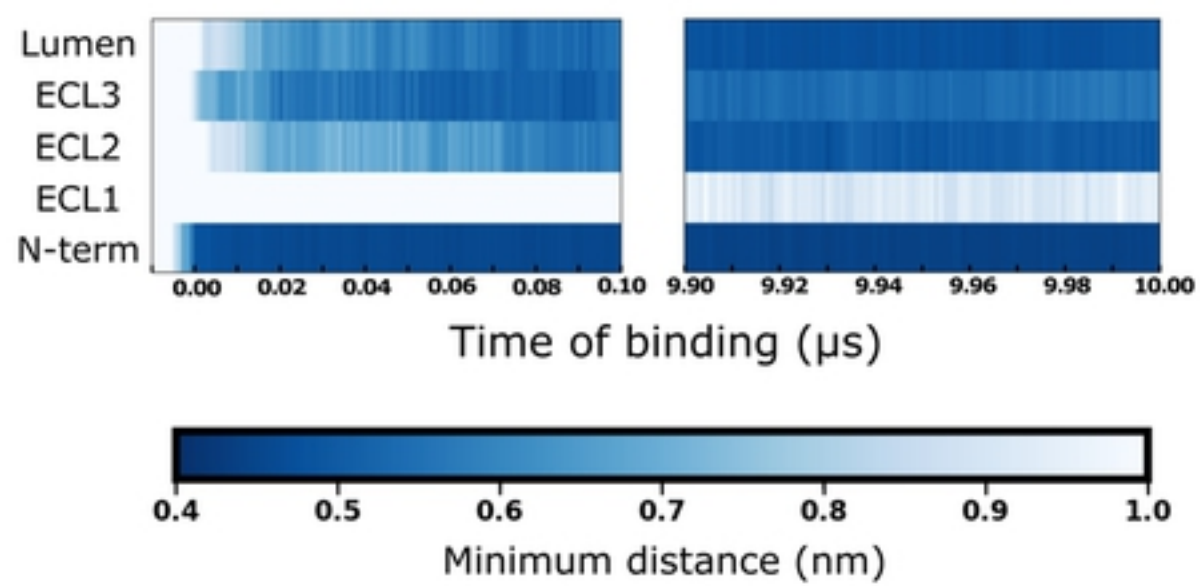

Figure 3  
Kharche *et al.*

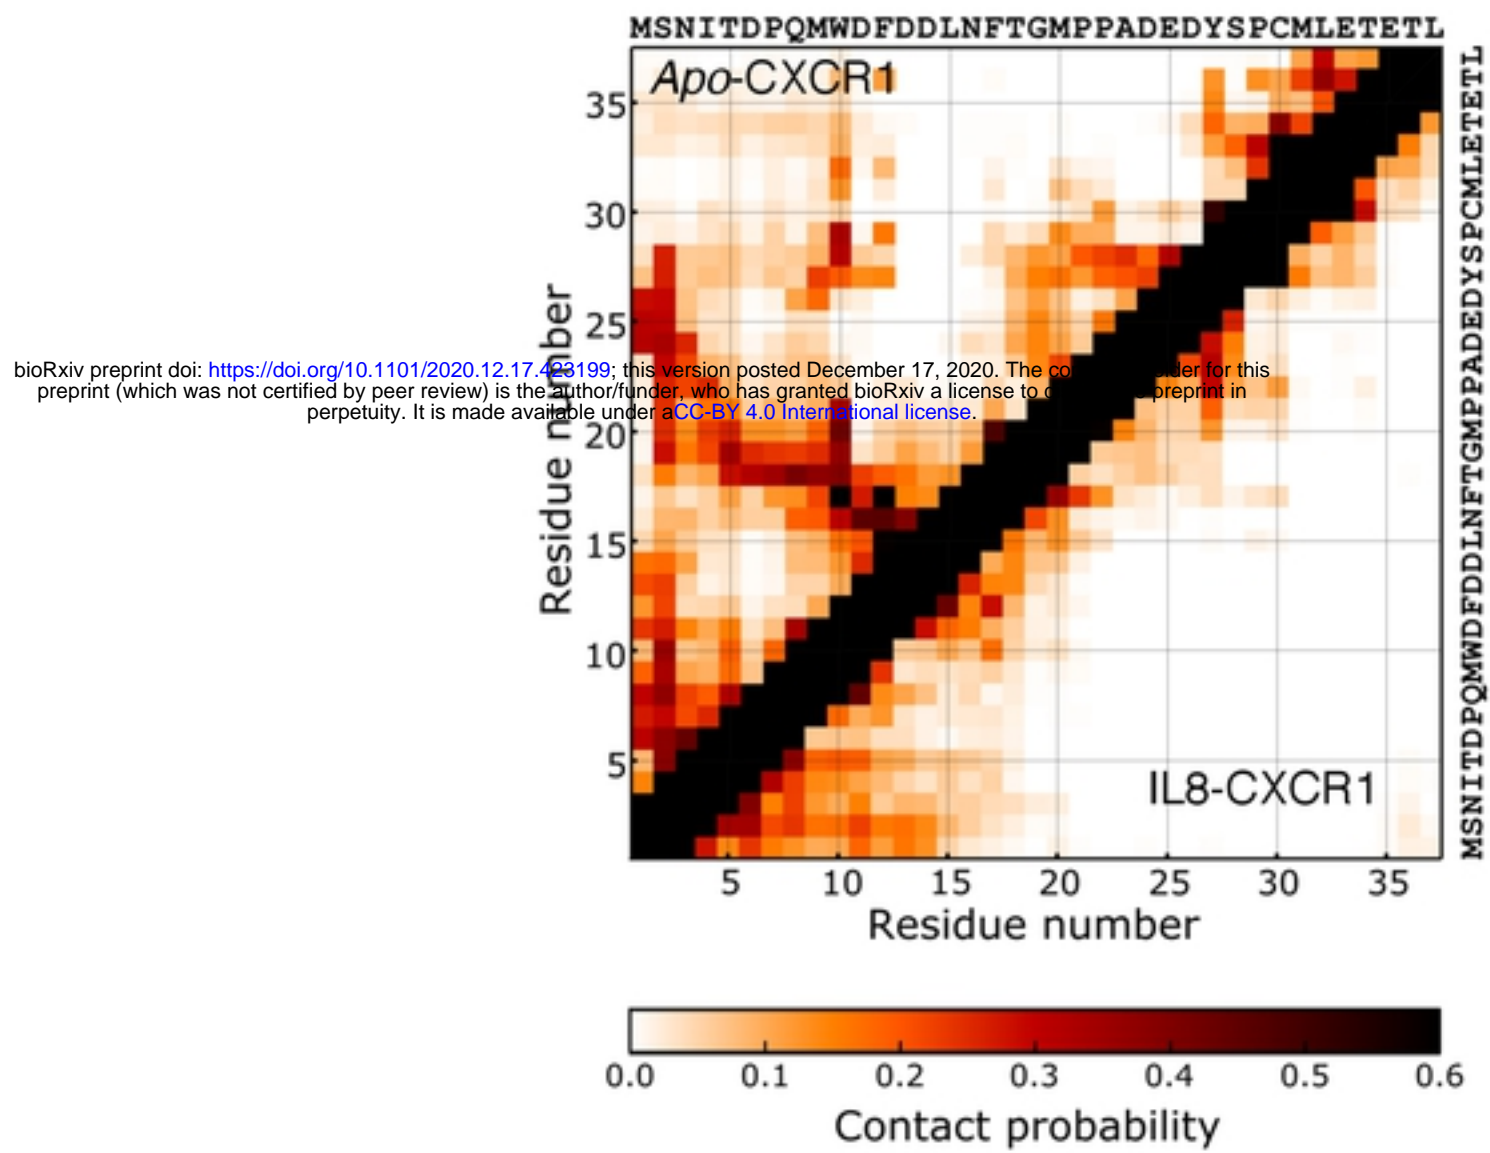

**Figure 4**  
**Kharche *et al.***

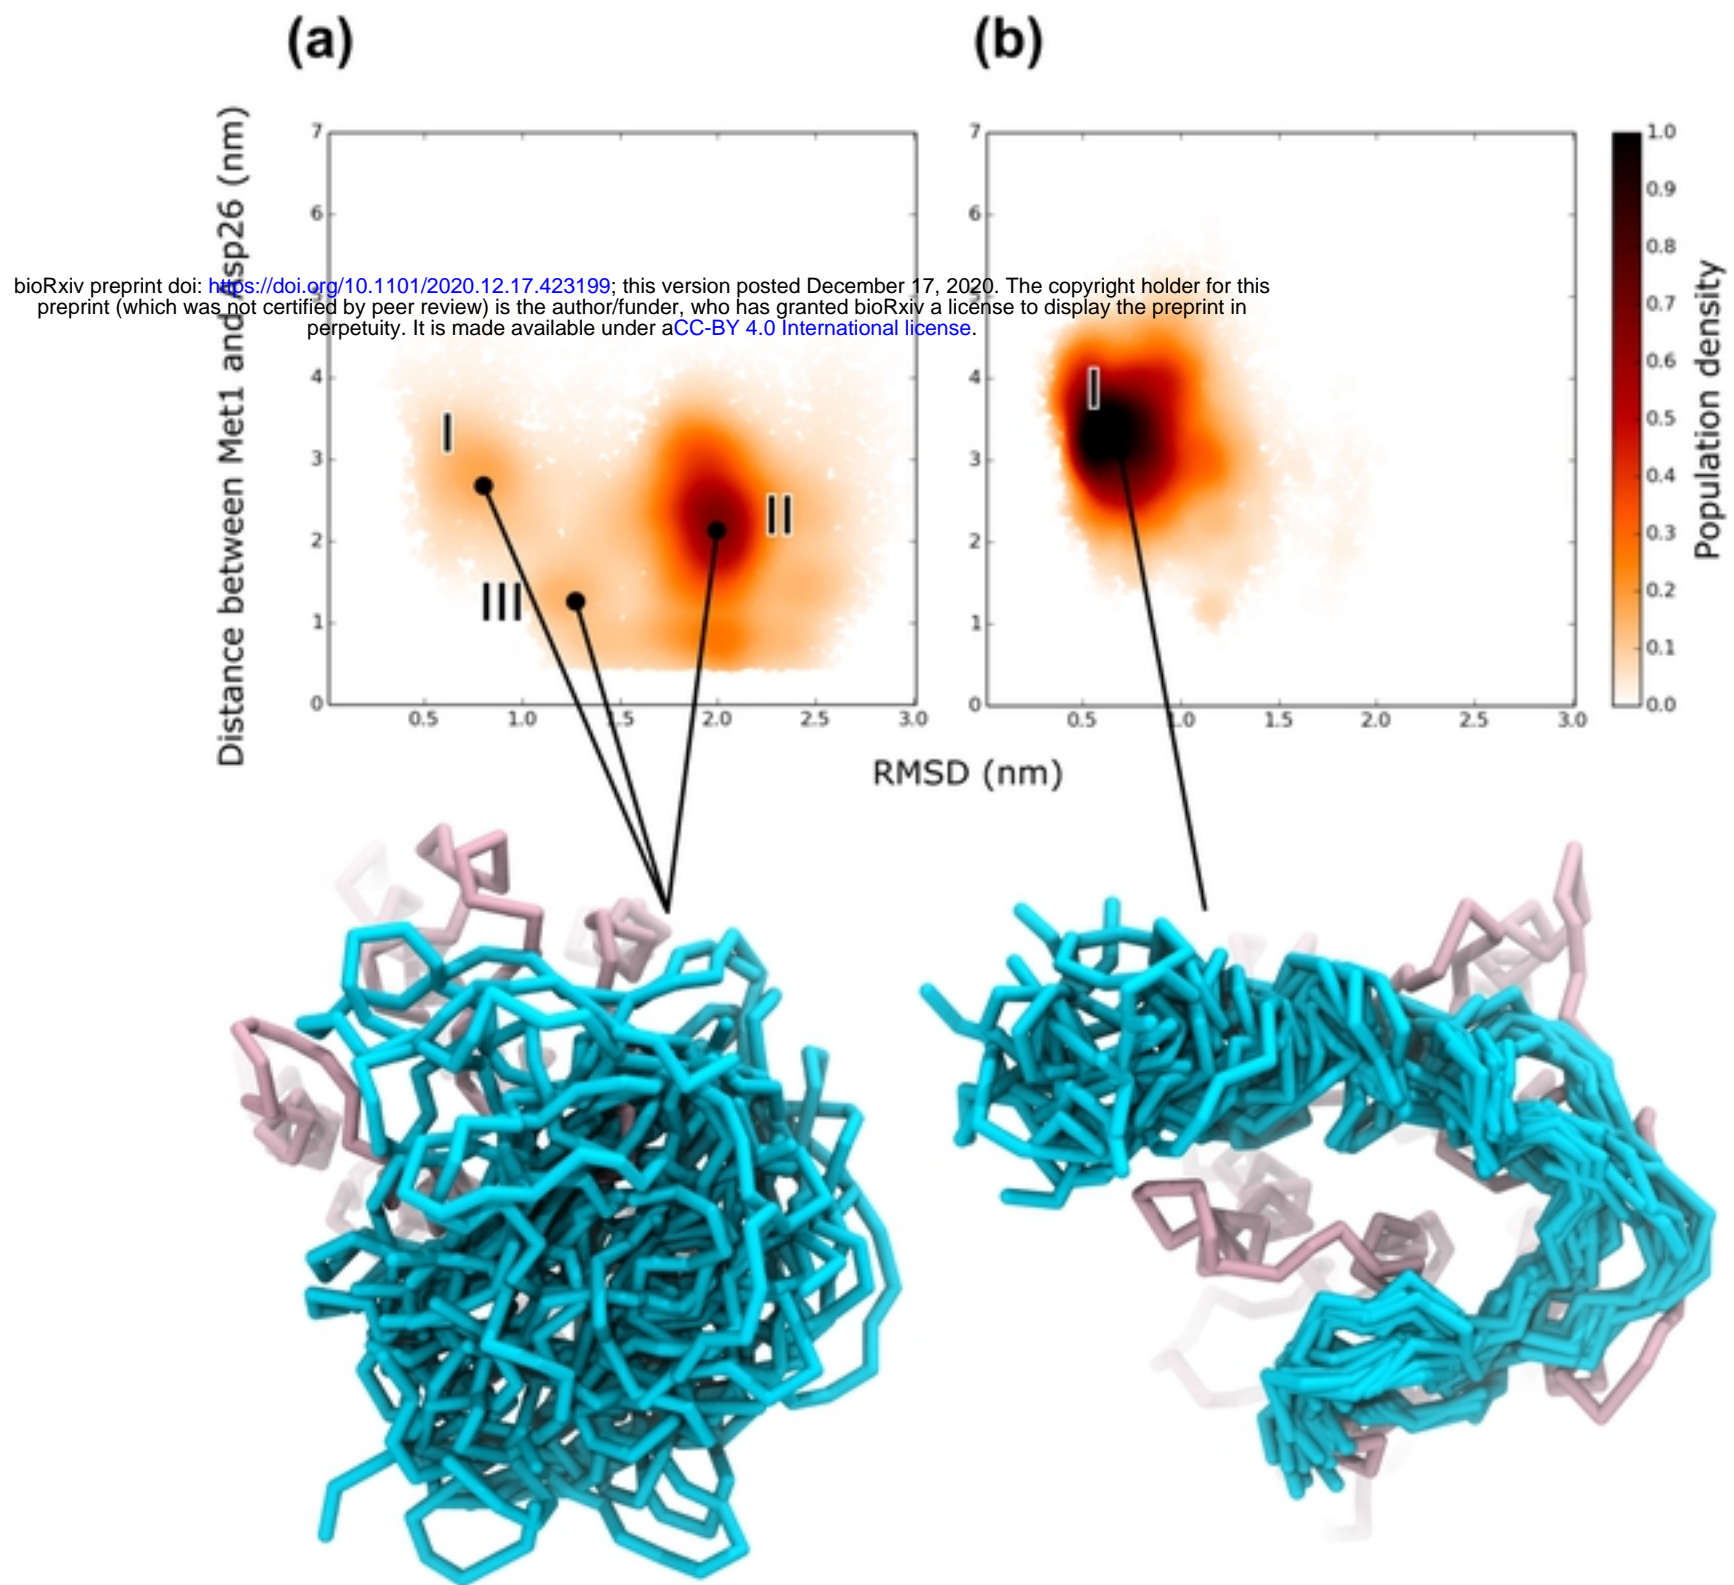

**Figure 5**  
**Kharche *et al.***

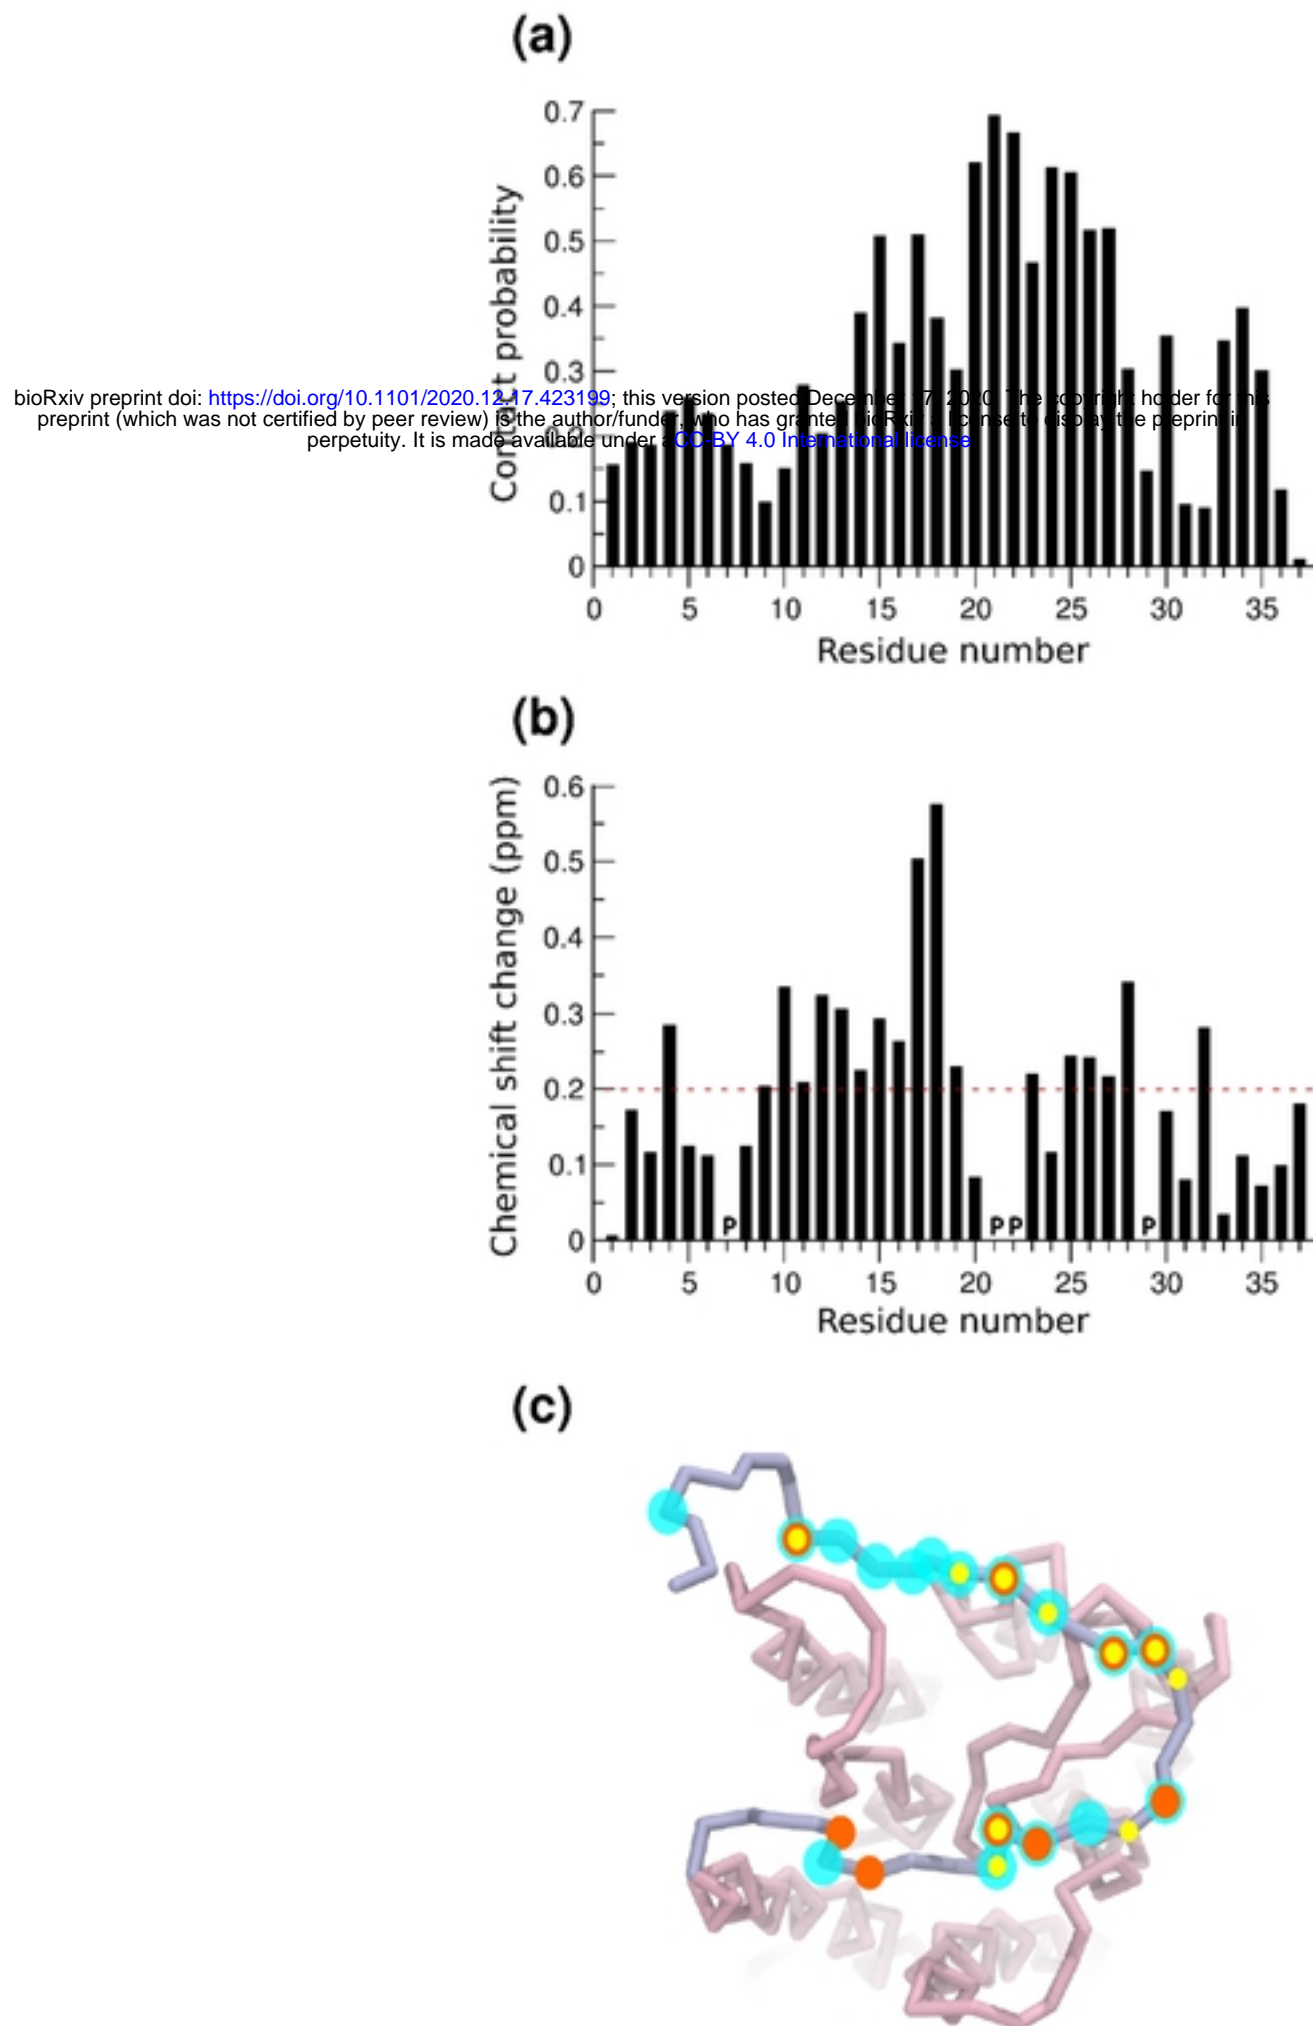

**Figure 6**  
**Kharche *et al.***

bioRxiv preprint doi: <https://doi.org/10.1101/2020.12.17.423199>; this version posted December 17, 2020. The copyright holder for this preprint (which was not certified by peer review) is the author/funder, who has granted bioRxiv a license to display the preprint in perpetuity. It is made available under aCC-BY 4.0 International license.

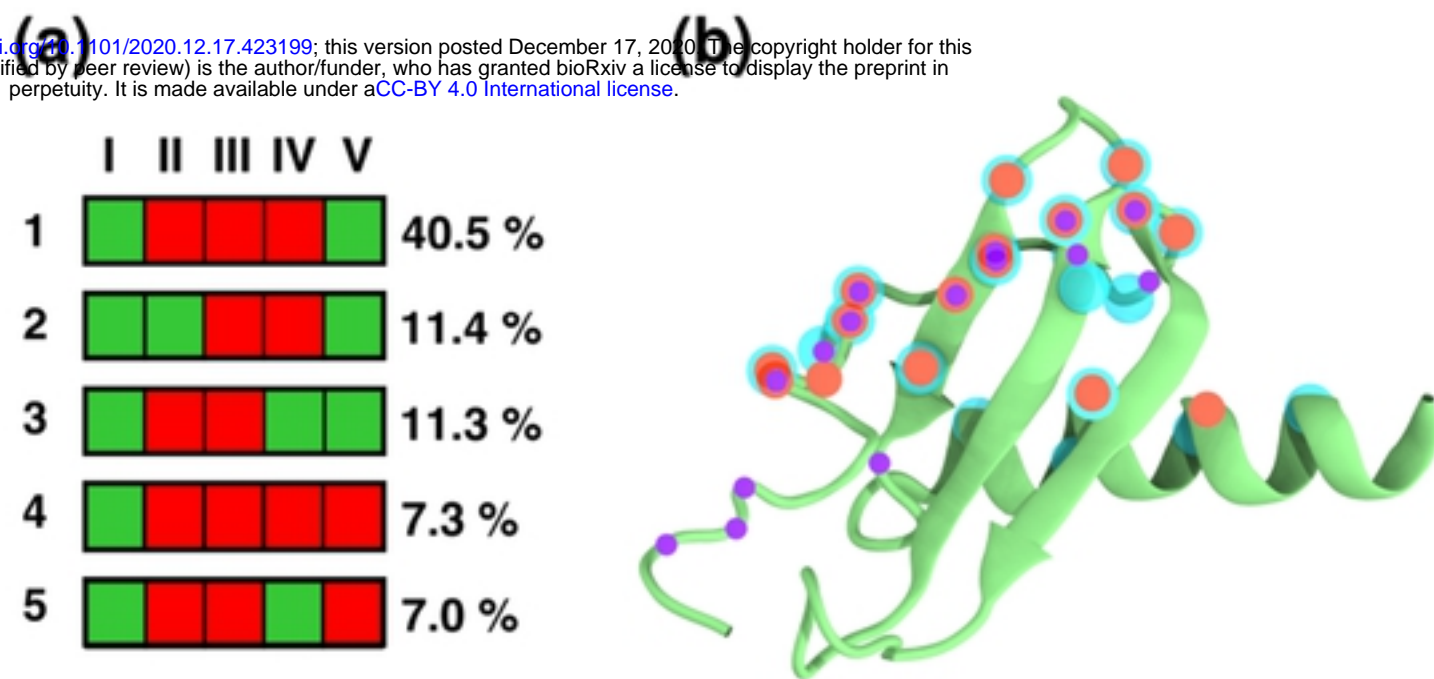

Source: http://biorxiv.org/content/10.1101/2020.12.17.423199v1.full.pdf
